# Supplementary material for: Estimation of ground level particulate matter concentrations through the synergistic use of satellite observations and process-based models over South Korea
Source: Copernicus journal article supplement (doi:10.5194/acp-2018-647), 2018-09-13
Supplement: Supplementary file [file acp-2018-647-AC1-supplement.pdf]

## Authors' responses (ACP-2018-647)

The authors would like to thank the editors and the reviewers for their precious time and invaluable comments. The corresponding changes and refinements are highlighted in yellow in the revised paper and are also summarized in our responses below. Authors' responses are in blue. Reviewer's comments are in black. When the manuscript is cited, it is shown in italics.

### Reviewer # 1

#### Major comments:

1. In Fig 8, the GOCI-GEOS-Chem fused  $PM_{2.5}$  seems to have considerably larger bias than even just the GEOS-Chem simulated  $PM_{2.5}$ , which is not what I was expecting since GOCI AOD provides an observational constraint to the simulation. Could you please explain why GOCI-GEOS-Chem fused  $PM_{2.5}$  has such a large bias? Also you mentioned in text P20L10 that  $R^2$  and slope of the GOCI-GEOS-Chem fused  $PM_{2.5}$  is better than the GEOS-Chem  $PM_{2.5}$ . Could you please put them into numbers?

→ The slope and  $R^2$  values were additionally added in the text for clarity. In fact, the bias of GOCI-GEOS-Chem fused  $PM_{2.5}$  was less than the bias of GOCI-Chem simulated  $PM_{2.5}$ . However, the RMSE and  $R^2$  of GOCI-GEOS-Chem fused  $PM_{2.5}$  were larger than those of GEOS-Chem simulated  $PM_{2.5}$  due to overestimation.

→ P21L12: *"Consequently, the proposed RF models have the lowest RMSE, MB, and ME among those models. Although the results of GOCI-GEOS-Chem fused  $PM_{2.5}$  showed that  $R^2$  (GEOS-Chem  $PM_{2.5}$ : 0.00, GOCI-GEOS-Chem fused  $PM_{2.5}$ : 0.14) and slope (GEOS-Chem  $PM_{2.5}$ : -0.02, GOCI-GEOS-Chem fused  $PM_{2.5}$ : 1.41) improved more than those of GEOS-Chem  $PM_{2.5}$ , the RMSE, MB, and ME of the fused model were higher than the GEOS-Chem model because the fused model overestimated PM concentrations."*

2. The description of data used in this study needs to be more detailed. For example, for observations of PM, suggest to include general description of how PM is measured, like what instrument is used. For GEOS-Chem and CMAQ simulations, you should include model version, what meteorological fields are used, what emissions are used to help readers interpret results.

→ Additional descriptions for observations of PM, GEOS-Chem, and CMAQ were added.

→ P5L10: *"PMs at stations are measured based on a beta attenuation monitoring (BAM) technique which is widely used for automatic air monitoring (Zhan et al., 2017; Zhao et al., 2016). The measurement results are expressed as mass concentration per unit volume (i.e.,  $\mu\text{g}/\text{m}^3$ ) converted to room temperature (20 °C, 1 atm)."*

→ P12L26: *"The GEOS-Chem v10-01 was utilized with the Global Forecast System (GFS; produced by the National Centres for Environmental Prediction (NCEP)) as meteorological fields, and MIX Asian emission inventory as emissions. The CMAQ model version 4.7.1 was used to simulate the ground-level  $PM_{10}$  and  $PM_{2.5}$  concentrations. Meteorological fields simulated by the Weather Research and Forecasting (WRF) model and emission data from the SMOKE model were utilized to run the CMAQ model."*

## Authors' responses (ACP-2018-647)

3. I didn't understand why the RF PM in Fig 8 was different from that in Fig 9. Could you please explain what makes the difference?

→ The RF-predicted PM was resampled to match the spatial resolution with each process-based model (i.e., GEOS-Chem ( $0.25^\circ \times 0.3125^\circ$ ), CMAQ (9 km X 9 km)). The considered dates were also different in order to compare the results on the same scale (GEOS-Chem: from January to September 2016, CMAQ: 2015-2016).

4. I'm surprised to see that the PM estimates from MODIS are basically the same as they are from GOCI given that MODIS provides about 8 times less data than GOCI and that MODIS cannot resolve the diurnal variation of AOD yet GOCI can. I was expecting that MODIS will have at least larger variability than GOCI but it is not the case either in Fig 7. Could you please explain why GOCI is not showing a pronounced enhancement over MODIS here?

→ GOCI provides data eight times a day, but the model developed in this paper only considered the GOCI aerosol data at 04:00 UTC, when MODIS data are available.

→ The benefit of using GOCI lies in its high temporal resolution (8 times a day). Choi et al. (2018) showed that the accuracy of GOCI AOD is comparable (slightly higher than) to that of MODIS AOD.

→ Supplementary Figure 2 shows the comparison between observed PM concentrations and satellite-derived AODs. The left column depicts the relationship between PM concentrations and MODIS-derived AODs. The right column displays the relationship between PM concentrations and GOCI-derived AODs. There is slightly higher correlation between PMs and GOCI-derived AODs than between PMs and MODIS-derived AODs.

→ The GOCI(V2)-derived AOD was compared with MODIS-derived DT/DB AOD using AERONET AOD over the GOCI coverage region (Table 2 in Choi et al., 2018). These comparisons showed similar results in terms of R, MB, and RMSE. We only focused on the land AOD comparison in the red box because we used the AOD over the land area.

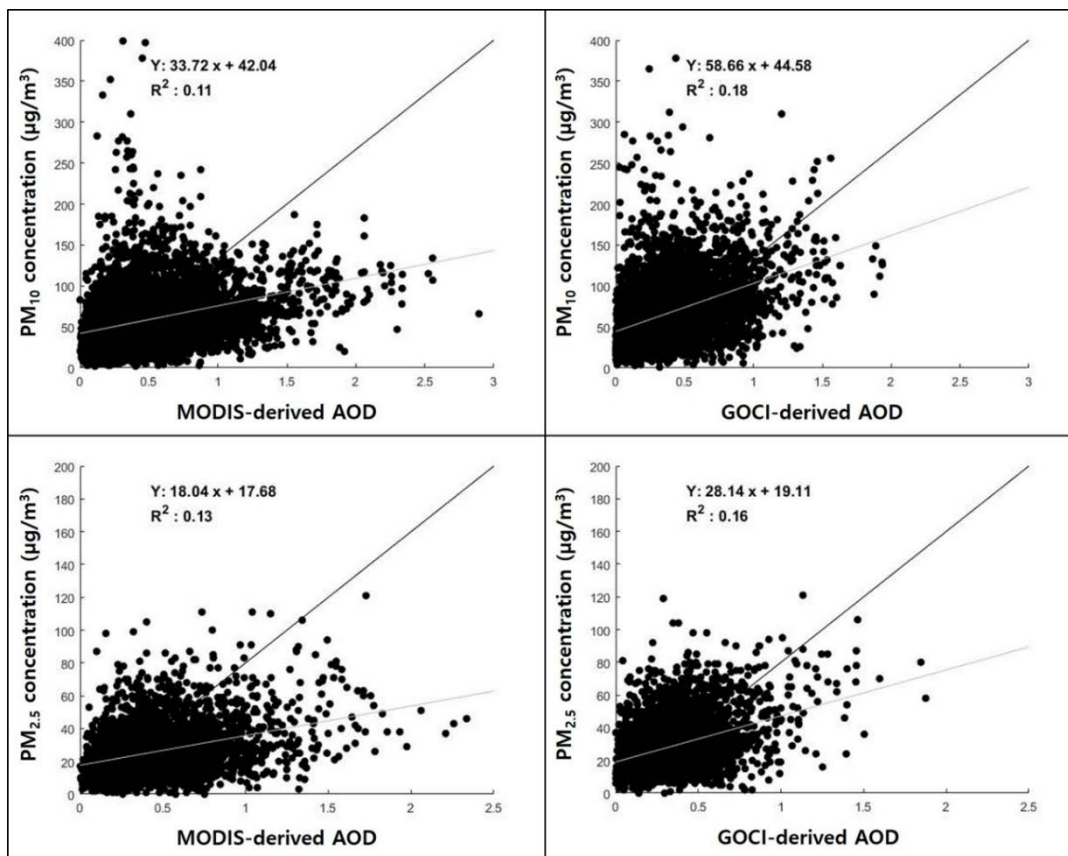

Supplementary Figure 2: Comparison of PM concentrations to MODIS-derived AOD (left column) and GOCI-derived AOD (right column), (a) comparison between PM<sub>10</sub> and MODIS-derived AOD, (b) comparison between PM<sub>10</sub> and GOCI-derived AOD, (c) comparison between PM<sub>2.5</sub> and MODIS-derived AOD, (d) comparison between PM<sub>2.5</sub> and GOCI-derived AOD.

Table 2. Statistics of land and ocean AOD comparisons between AERONET/SONET and satellite products, as shown in Fig. 3.

| Satellite AOD algorithm           | N      | R    | MB     | f within EE <sub>DT</sub> | RMSE |
|-----------------------------------|--------|------|--------|---------------------------|------|
| Land AOD comparison with AERONET  |        |      |        |                           |      |
| GOCI YAER V1 all QA               | 47 850 | 0.86 | -0.015 | 0.49                      | 0.24 |
| GOCI YAER V1 QA3                  | 38 183 | 0.92 | -0.066 | 0.49                      | 0.18 |
| GOCI YAER V2                      | 45 643 | 0.91 | 0.010  | 0.60                      | 0.16 |
| MODIS DT                          | 3228   | 0.92 | 0.043  | 0.62                      | 0.18 |
| MODIS DB                          | 3463   | 0.93 | 0.007  | 0.73                      | 0.16 |
| Land AOD comparison with SONET    |        |      |        |                           |      |
| GOCI YAER V1 all QA               | 12 974 | 0.83 | -0.048 | 0.45                      | 0.29 |
| GOCI YAER V1 QA3                  | 10 483 | 0.88 | -0.103 | 0.42                      | 0.27 |
| GOCI YAER V2                      | 12 238 | 0.86 | -0.021 | 0.51                      | 0.24 |
| MODIS DT                          | 733    | 0.82 | 0.104  | 0.46                      | 0.29 |
| MODIS DB                          | 1258   | 0.86 | 0.000  | 0.67                      | 0.27 |
| Ocean AOD comparison with AERONET |        |      |        |                           |      |
| GOCI YAER V1 all QA               | 19 945 | 0.83 | 0.056  | 0.55                      | 0.17 |
| GOCI YAER V1 QA3                  | 18 308 | 0.88 | 0.043  | 0.62                      | 0.13 |
| GOCI YAER V2                      | 18 499 | 0.89 | 0.008  | 0.71                      | 0.11 |
| MODIS DT                          | 680    | 0.92 | 0.033  | 0.73                      | 0.09 |

## Authors' responses (ACP-2018-647)

5. As you've shown in Fig 4 that meteorological parameters have playing an important role in relating AOD to PM<sub>2.5</sub> as well. Could you please comment on the accuracy of these parameters?

→ Figure 4 shows the variable importance of the top 10 input variables identified by the random forest models for estimating ground-level PM<sub>10</sub> and PM<sub>2.5</sub> concentrations. Random forest ranks the relative importance of each variable using out-of-bag (OOB) data which are not used in training the model. The OOB error is defined as the difference between the actual value of data and the prediction result from each tree. The importance of the *i*-th variable is defined as the average of difference between OOB error from original dataset and replaced dataset for all trees. It should be noted that the relative importance is local, and thus the results do not mean that the top identified variables globally contributed to the model.

→ Unfortunately, the official accuracy of the parameters themselves from the numerical model was not available. The key meteorological variables contributing to the estimation of the ground level PM concentrations were discussed in the text, including the wind speed, radiation, and visibility.

→ P16L8-19: *"Some meteorological variables indicating the atmospheric conditions also contributed to the estimation of ground-level PM concentrations in the improved models. There is a relationship between solar radiation and aerosols in which solar radiation reaching the surface increases with decreasing aerosol concentration (Préndez et al., 1995; Hu et al., 2017a; Borlina and Rennó, 2017). Prior studies noted that there is an inverse relationship between wind speed and both PM<sub>10</sub> and PM<sub>2.5</sub> (Gupta et al., 2006; Maraziotis et al., 2008; Krynicka and Drzeniecka-Osiadacz, 2013). This relationship causes an increase in PM concentrations under low wind speed conditions but a decrease under high wind speed conditions, which is also confirmed in the present study. This means that atmospheric conditions such as air stagnation have significant impacts on surface PM concentrations. The results correspond to previous studies (e.g., You et al., 2015; Yeganeh et al., 2017; Hu et al., 2017b; Yu et al., 2017) showing that meteorological factors are strongly effective in improving PM estimation models. Interestingly, the anthropogenic factors such as LC\_ratio (urban ratio), PopDens (population density), NH<sub>3</sub>, and SO<sub>2</sub> were more important for PM<sub>2.5</sub> estimation than PM<sub>10</sub>. This implies that the sources of PM<sub>2.5</sub> are mainly anthropogenic in South Korea (Moon et al., 2011; gon Ryou et al., 2018)."*

6. You mentioned in the paper that RF well estimates PM high concentrations. Could you please elaborate what findings support this statement? And why RF is good in estimating high concentrations but not small? What potential bias in RF can be reflected from this finding?

→ When using the balanced training samples (i.e., through over-/sub-sampling), the accuracy of the RF models significantly improved, especially for high concentration samples. The comparison of the model performances with and without the sampling strategies is shown in Table 4. Good performance for high concentrations does not

## Authors' responses (ACP-2018-647)

mean poor performance for low concentrations. Of course, since the RF models were trained using more balanced samples (similar sample size of low and high concentrations), they produced much better performance than those with the original training samples (biased sample size: much large for low concentrations). However, as you can see, there was slight accuracy decrease for the test samples of low concentrations (refer to the following table). However, such a small decrease can be compromised with dramatic accuracy increase for high concentrations.

- We added an explanation of this potential bias toward low concentration samples.
- P13L17: *"This significant improvement in the estimation performance was mainly due to the proposed sampling strategies in order to use more balanced training data. The use of the balanced training data resulted in the huge increase of the estimation accuracy of ground-level PM concentrations especially for high concentration samples at the compensation of slight accuracy decrease for low concentrations."*

| PM10_original     |      |        |       |        |       |       |           |
|-------------------|------|--------|-------|--------|-------|-------|-----------|
| Interval          | R2   | RMSE   | rRMSE | MB     | ME    | slope | intercept |
| All               | 0.58 | 24.34  | 36.96 | -5.24  | 15.41 | 0.48  | 28.94     |
| <=30 (low)        | 0.10 | 15.15  | 64.54 | 11.62  | 12.00 | 0.58  | 21.48     |
| >150 (high)       | 0.00 | 102.19 | 52.16 | -88.53 | 88.53 | 0.01  | 104.74    |
| PM10_oversamples  |      |        |       |        |       |       |           |
| Interval          | R2   | RMSE   | rRMSE | MB     | ME    | slope | intercept |
| All               | 0.78 | 17.08  | 25.94 | 2.93   | 12.78 | 0.78  | 17.16     |
| <=30 (low)        | 0.08 | 18.46  | 78.64 | 13.95  | 14.23 | 0.64  | 22.35     |
| >150 (high)       | 0.74 | 29.27  | 14.94 | -17.69 | 18.56 | 0.88  | 6.61      |
| PM2.5_original    |      |        |       |        |       |       |           |
| Interval          | R2   | RMSE   | rRMSE | MB     | ME    | slope | intercept |
| All               | 0.59 | 10.53  | 36.46 | -2.30  | 7.37  | 0.46  | 13.30     |
| <=15 (low)        | 0.03 | 8.21   | 70.10 | 6.68   | 6.77  | 0.26  | 15.30     |
| >75 (high)        | 0.02 | 47.91  | 51.05 | -44.40 | 44.40 | 0.11  | 38.74     |
| PM2.5_oversamples |      |        |       |        |       |       |           |
| Interval          | R2   | RMSE   | rRMSE | MB     | ME    | slope | intercept |
| All               | 0.73 | 8.25   | 28.58 | 1.71   | 6.18  | 0.77  | 8.30      |
| <=15 (low)        | 0.03 | 9.90   | 84.55 | 7.93   | 8.03  | 0.33  | 15.73     |
| >75 (high)        | 0.96 | 5.29   | 5.64  | -3.88  | 4.29  | 1.13  | -15.77    |

7. P11L19. Could you please make clear if the remaining aerosol variables (AE, FMF, etc) come from GOCI? If so, they are given at different temporal resolutions from MODIS

## Authors' responses (ACP-2018-647)

AOD. Could you please justify this?

- The word "*remaining data*" was replaced with "*remaining samples*" to avoid confusion. "*Remaining samples*" indicate the samples excluding the training samples from each dataset for MODIS- and GOCI-based RF models, not aerosol variables that come from GOCI. As mentioned in the text, GOCI-based RF model is developed focused on 13:00 KST when the acquisition time of MODIS Aqua aerosol products over the study area (See P7L21-Section 2.2.5).
- P12L24: "*... while the remaining samples were used to validate the models.*"

## Authors' responses (ACP-2018-647)

### Minor comments:

1. Suggest to distinguish subplots (e.g., Fig 3, 4, 5, 6, 7, 8, 9) by adding titles and remove letter like (a), (b), so readers don't need to refer to the caption to find what each subplots means. Then captions can be more concise.  
  
→ Revised as suggested. Titles for subplots were added in figures and captions were more concise than before.
2. In Fig 3, what do different colors in circles mean?  
  
→ The color scheme in Figure 3 is the point density of the scatterplots. We added this to the figure caption.  
→ *"The colour scheme from blue to red indicates the point density: The blue point means low density while the red point shows high density."*
3. P2L10-17: I didn't understand how the example of Zang et al., (2017) supported the statement of the limitation of ground-based measurements.  
  
→ The Zang et al. (2017) briefly talked about the limitation of using station parameters in their paper. We additionally mentioned the following sentence.  
→ P2L16: *"Their study suggested an inversion model to estimate PM<sub>2.5</sub> but showed a limitation in that the model can only be used in areas near ground stations, which are required by the model to derive its parameters."*
4. P2L31: I suggest to move CTM to the next paragraph to have this paragraph focused on statistical method. Also this is a good place to introduce RF. Maybe moving the introduction of RF starting from P10L15 to this paragraph.  
  
→ Revised as suggested. We also added more description for clarity.  
→ P2L29-P3L10: *"Chemical transport models (CTM) have also been combined with satellite observations to estimate ground-level PM concentrations. To estimate global 6-year (2001-2006) averaged PM<sub>2.5</sub> concentrations, Van Donkelaar et al. (2010) combined Moderate Resolution Imaging Spectroradiometer (MODIS) and MISR-derived AODs, and multiplied them by the ratio between PM<sub>2.5</sub> and AOD simulated by the GEOS-Chem model (i.e., CTM). Their results showed a strong spatial agreement with in-situ PM<sub>2.5</sub> concentrations in North America (slope = 1.07; R<sup>2</sup> = 0.59). More recent studies explored advanced statistical and machine learning approaches to improve the prediction of ground-level PM concentrations by deploying mixed-effects models, geographically weighted regression (GWR), support vector machines (SVM), or artificial neural networks (ANN) (Gupta et al., 2009b; You et al., 2015; Li et al., 2017a; Chen et al., 2018). Machine learning approaches have been widely used in various remote sensing studies thanks to their flexibility with classification and regression (Im et al., 2009; Lu et al., 2011a, Liu et al., 2015; Ke et al., 2016; Pham et al., 2017; Forkuor et al., 2018). In particular, random forest (RF) has proved to be useful for remote sensing-based regression tasks (Yoo et al., 2012;*



## Authors' responses (ACP-2018-647)

*Jang et al., 2017; Richardson et al., 2017; Yoo et al., 2018). To estimate daily PM<sub>2.5</sub> concentrations over the United States, Hu et al. (2017b) incorporated MODIS AOD, simulated GEOS-Chem AOD, meteorological data, and land-use information in an RF model."*

5. P5 section 2.2.2 and 2.2.3: suggest to describe what data a satellite or model is used to provide to this study as the very first sentence when introducing a new model. It can be very confusing given so many different models and names all introduced in this section.
  - ➔ The summary of the satellite and model data used was added at the very beginning of each section.
  - ➔ P5L15: *"Various remote sensing data were used in this study such as GOCI aerosol products, MODIS Normalized Difference Vegetation Index (NDVI), land cover product, Global Precipitation Measurement (GPM) 30-min precipitation data, and the Shuttle Radar Topography Mission (SRTM) elevation data."*
  - ➔ P7L3: *"Along with satellite-based data, the outputs from three models were combined. The three models were: the Regional Data Assimilation and Prediction System (RDAPS), the Sparse Matrix Operator Kernel Emissions (SMOKE), and the Breathing Earth System Simulator (BESS)."*
  
6. P7L23, please put "high concentration" into numbers.
  - ➔ Actually, we considered the log-transformation because the observed PM concentration has large concentration range. The large concentration range leads to underestimate at high concentration due to lack of high concentration samples in the dataset. For this reason, we changed the sentence to the following.
  - ➔ P8L9: *"The observed PM concentrations (i.e., target variables) were log-transformed because the concentration range is large and has a positively skewed distribution."*
  
7. P11L16, "MODIS only provides AOD with 3 km resolution". Could you please verify whether MODIS AOD is 3 km? I think it should be 10 km.
  - ➔ MODIS provides the AOD product with both 10 km and 3 km resolutions.
  
8. P13L8, why summer sample size is small? If it's due to cloud contamination, then should be swap the order of cloud contamination and small sample size in the sentence.
  - ➔ It is because of cloud contamination, so that sentence is changed following your comment.
  - ➔ P14L10: *"The cloud contamination and the relatively small sample size in summer, might lead to estimation errors."*
  
9. P15L3-4: It seems that the example of Asia dust events at high altitudes is used to support the case of high PM and low AOD. I think it's actually conflicting to the statement. I'd expect high altitude dusts contribute to high AOD yet low surface PM.



## Authors' responses (ACP-2018-647)

Could you please explain?

- There was some mistake in explaining the result and we modified the sentence.
- P16L3: *"Careful examination of the samples shows that there were Asian dust events at low altitudes in those cases, which were not effectively included in the AOD derived from satellite sensor systems. In other words, the satellite-derived AOD has a weak sensitivity in capturing aerosols at low altitudes (Choi et al. 2018)."*

10. P15L8: "in which solar radiation increases with decreasing aerosol concentration", do you mean solar radiation reaching the surface increases with ...?

- Yes. We revised the text accordingly.
- P16L10: *"... in which solar radiation reaching the surface increases with decreasing aerosol concentration."*

11. P18L16, I got an impression that the author seemed to be overemphasizing the 500m resolution in the paper. However, all GOCI data used in this study are aggregated to 6km, so suggest to change 500 m resolution to 6 km and change high spatial resolution to moderate spatial resolution. Also please change the spatial resolution about GOCI aerosol products to 6km elsewhere too.

- GOCI aerosol products used in this study have 6 km resolution although GOCI L1B data are provided 8 times a day with 500 m of spatial resolution. We accepted your suggestion and revised as following.
- P19L16-P20L2: *"Considering the advantages of GOCI as a geostationary satellite sensor (i.e., moderate spatial and temporal resolutions; 8 times a day with a 6 km grid size of the aerosol product), it is very promising to use GOCI-derived products as input to PM estimation models. It should also be noted that GOCI-2, which has enhanced sensor specifications (i.e., 10 data collections per day at 3 km spatial resolution of the aerosol product) is planned to be launched in 2019."*

## Authors' responses (ACP-2018-647)

### Technical comments:

1. P1L1: should be "ground-level"  
  
→ Revised as suggested.  
P1L1: *"Estimation of ground-level particulate matter concentrations..."*
2. P1L16: "The long exposure" should be "Long-term exposure".  
  
→ Revised as suggested.  
P1L16: *"Long-term exposure to particulate matter (PM) with..."*
3. P1L29: "the proposed RF MODELS yielded better performance" than what?  
  
→ The proposed RF models showed better performance than the process-based approaches (i.e., GEOS-Chem and CMAQ). Revised accordingly.
4. P2L3: "especially PM<sub>10</sub> and PM<sub>2.5</sub>". This is where the abbreviation PM should be introduced, not at line 11.  
  
→ The abbreviation PM is relocated at P2L3 for describing PM<sub>10</sub> and PM<sub>2.5</sub> instead at line 11.  
→ P2L3: *"... especially PM<sub>10</sub> and PM<sub>2.5</sub> (particulate matter (PM) with an aerodynamic diameter..."*  
→ P2L11: *"... in providing spatially continuous PM concentrations that..."*
5. P2L17: cut "on the other hand".  
  
→ We removed it as suggested.
6. P5L7: should be "at" 400nm and 870nm.  
  
→ Revised as suggested.  
P5L22: *"... and Ångström exponent (AE) at 440 and 870 nm with..."*
7. P5L8: change "MODIS" to "MODIS satellite instrument".  
  
→ Revised as suggested.  
P5L24: *"MODIS satellite instrument, onboard the Terra and Aqua satellites..."*
8. P5L9: cut "to observe the Earth's environment".  
  
→ We removed it as suggested.

## Authors' responses (ACP-2018-647)

9. P5L10, change “and Aerosol...” to “, Aerosol”

→ Revised as suggested.

P5L25: *“with 1 km resolution (MYD13A2; Solano et al., 2010), Aerosol 5-min L2 swath data...”*

10. P7L4, change “which is one of the ... and” to “as”

→ Revised as suggested.

P7L17: *“The selected parameters are mostly those defined by Aerosol Emission 5 (AE5) as major precursors forming the PM...”*

11. P16L9, cut “ Thus, .. data pixels”.

→ Revised as suggested.

12. P16L13, cut “season”.

→ Revised as suggested.

13. P20L3-4, suggest to cut “Some studies investigated ... Xu et al., 2015a) to avoid repetition to the introduction.

→ Revised as suggested.

# Estimation of **ground-level** particulate matter concentrations through the synergistic use of satellite observations and process-based models over South Korea

Seohui Park<sup>1,\*</sup>, Minso Shin<sup>1,\*</sup>, Jungho Im<sup>1</sup>, Chang-Keun Song<sup>1</sup>, Myungje Choi<sup>2</sup>, Jhoon Kim<sup>2</sup>, Seungun Lee<sup>3</sup>, Rokjin Park<sup>3</sup>, Jiyoung Kim<sup>4</sup>, Dong-Won Lee<sup>5</sup>, and Sang-Kyun Kim<sup>5</sup>

<sup>1</sup>School of Urban & Environmental Engineering, Ulsan National Institute of Science and Technology, Ulsan, 44919, Republic of Korea

<sup>2</sup>Department of Atmospheric Sciences, Yonsei University, Seoul, 03722, Republic of Korea

<sup>3</sup>School of Earth and Environmental Sciences, Seoul National University, Seoul, 08826, Republic of Korea

10 <sup>4</sup>Global Environment Research Division, Climate and Air Quality Research Department, National Institute of Environmental Research, Incheon, 22689, Republic of Korea

<sup>5</sup>Environmental Satellite Centre, Climate and Air Quality Research Department, National Institute of Environmental Research, Incheon, 22689, Republic of Korea

\*These authors equally contributed to the paper.

15 *Correspondence to:* Jungho Im (ersgis@unist.ac.kr)

**Abstract.** **Long-term** exposure to particulate matter (PM) with aerodynamic diameters  $< 10 \mu\text{m}$  ( $\text{PM}_{10}$ ) and  $2.5 \mu\text{m}$  ( $\text{PM}_{2.5}$ ) has negative effects on human health. Although station-based PM monitoring has been conducted around the world, it is still challenging to provide spatially continuous PM information for vast areas at high spatial resolution. Satellite-derived aerosol information such as aerosol optical depth (AOD) has been frequently used to investigate ground-level PM concentrations. In this study, we combined multiple satellite-derived products including AOD with model-based meteorological parameters (i.e. dew-point temperature, wind speed, surface pressure, planetary boundary layer height, and relative humidity) and emission parameters (i.e. NO, NH<sub>3</sub>, SO<sub>2</sub>, POA, and HCHO) to estimate surface PM concentrations over South Korea. Random forest (RF) machine learning was used to estimate both  $\text{PM}_{10}$  and  $\text{PM}_{2.5}$  concentrations with a total of 32 parameters for 2015-2016. The results show that the RF-based models produced good performance resulting in  $R^2$  values of 0.78 and 0.73, and RMSEs of  $17.08 \mu\text{g}/\text{m}^3$  and  $8.25 \mu\text{g}/\text{m}^3$  for  $\text{PM}_{10}$  and  $\text{PM}_{2.5}$ , respectively. In particular, the proposed models successfully estimated high PM concentrations. AOD was identified as the most significant for estimating ground-level PM concentrations, followed by wind speed, solar radiation, and dew-point temperature. The use of aerosol information derived from a geostationary satellite sensor (i.e., GOCI) resulted in slightly higher accuracy for estimating PM concentrations than that from a polar-orbiting sensor system (i.e., MODIS). The proposed RF models yielded better performance **than the process-based approaches**, particularly in improving on the underestimation of the process-based models (i.e., GEOS-Chem and CMAQ).

## 1 Introduction

Epidemiological studies have consistently shown that negative human health effects including premature mortality can be caused by long-term exposure to atmospheric aerosols and particles, especially PM<sub>10</sub> and PM<sub>2.5</sub> (particulate matter (PM) with an aerodynamic diameter of less than 10 µm and 2.5 µm, respectively) (Pope III et al., 2009; Bartell et al., 2013; Jerrett et al., 5 2017). Consequently, the monitoring and assessment of exposure to PM<sub>10</sub> and PM<sub>2.5</sub> are crucial for effective management of public health risks. In recent decades, East Asia has been significantly industrialized and urbanized through its rapid economic growth. The industrialization and urbanization have resulted in adverse effects on air quality not only in this region but also in neighbouring countries (Koo et al., 2012).

The Public Health and Environment Research Institute in South Korea has been monitoring PM<sub>10</sub> and PM<sub>2.5</sub> concentrations at 10 numerous sites all over its jurisdiction. Even though the distribution of the monitoring sites is relatively dense, there is a limitation in providing spatially continuous PM concentrations that focus on major urban areas. For example, Zang et al. (2017) studied the effect of a temperature inversion layer on the relationship between aerosol optical depth (AOD) and PM<sub>2.5</sub>. The aerosol robotic network (AERONET) AOD and radiosonde data were used to estimate ground PM<sub>2.5</sub> concentrations through an optimized subset regression model. They found the temperature inversion layer to be a key factor in enhancing the accuracy 15 of a ground-level PM<sub>2.5</sub> estimation model with a coefficient of determination (R<sup>2</sup>) of 0.63 and a root mean square error (RMSE) of 35.45 µg/m<sup>3</sup> (Zang et al., 2017). Their study suggested an inversion model to estimate PM<sub>2.5</sub> but showed a limitation in that the model can only be used in areas near ground stations, which are required by the model to derive its parameters. Ground-based data typically have uncertainty for spatial distribution of PM concentrations as they are point-based measurements requiring spatial interpolation. Satellite-based PM monitoring has the potential to provide information on air quality over vast 20 areas at high spatial resolution. Many studies have examined the use of satellite-based products to estimate surface PM concentrations (Liu et al., 2005; Gupta and Christopher, 2009a,b; Van Donkelaar et al., 2010, 2015; Chudnovsky et al., 2014; Li et al., 2015; Xu et al., 2015a; You et al., 2015; Wu et al., 2016). AOD is the most widely used parameter that can be derived from satellite remote sensing to estimate ground-level PM concentrations. It represents the amount of light attenuation caused by atmospheric aerosol scattering and absorption in the vertical column.

25 Early studies generally adopted simple linear regression to investigate the relationship between total column AOD and surface PM concentrations (Liu et al., 2005; Liu et al., 2007). Liu et al. (2005) estimated ground-level PM<sub>2.5</sub> concentrations over the eastern United States using Multiangle Imaging Spectroradiometer (MISR)-derived AOD, Planetary Boundary Layer Height (PBLH) and Relative Humidity (RH) from the Goddard Earth Observing System (GEOS-3). Their results yielded an R<sup>2</sup> of 0.48 and an RMSE of 13.8 µg/m<sup>3</sup> when the estimated PM<sub>2.5</sub> concentrations were compared to in-situ measurements. Chemical 30 transport models (CTM) have also been combined with satellite observations to estimate ground-level PM concentrations. To estimate global 6-year (2001-2006) averaged PM<sub>2.5</sub> concentrations, Van Donkelaar et al. (2010) combined Moderate Resolution Imaging Spectroradiometer (MODIS) and MISR-derived AODs, and multiplied them by the ratio between PM<sub>2.5</sub>

and AOD simulated by the GEOS-Chem model (i.e., CTM). Their results showed a strong spatial agreement with in-situ PM<sub>2.5</sub> concentrations in North America (slope = 1.07; R<sup>2</sup> = 0.59).

More recent studies explored advanced statistical and machine learning approaches to improve the prediction of ground-level PM concentrations by deploying mixed-effects models, geographically weighted regression (GWR), support vector machines (SVM), or artificial neural networks (ANN) (Gupta et al., 2009b; You et al., 2015; Li et al., 2017a; Chen et al., 2018). Machine learning approaches have been widely used in various remote sensing studies thanks to their flexibility with classification and regression (Im et al., 2009; Lu et al., 2011a, Liu et al., 2015; Ke et al., 2016; Pham et al., 2017; Forkuor et al., 2018). In particular, random forest (RF) has proved to be useful for remote sensing-based regression tasks (Yoo et al., 2012; Jang et al., 2017; Richardson et al., 2017; Yoo et al., 2018). To estimate daily PM<sub>2.5</sub> concentrations over the United States, Hu et al. (2017b) incorporated MODIS AOD, simulated GEOS-Chem AOD, meteorological data, and land-use information in an RF model. The developed RF model produced an R<sup>2</sup> of 0.8 and an RMSE of 2.83 µg/m<sup>3</sup> from 10-fold cross validation.

Most previous studies have mainly used AOD produced from polar orbiting satellite sensor systems such as MODIS and MISR. They provide AOD worldwide but only make it available once a day because of the revisit time. A major problem with daily AOD is cloud contamination. Therefore, it is difficult to obtain spatially continuous AOD over cloudy regions such as East Asia in summer monsoon. AOD produced from geostationary satellite sensor systems may be a better option for estimating ground level PM concentrations due to it having a higher temporal resolution than polar orbiting sensor systems. The Geostationary Ocean Colour Imager (GOCI) is the world's first geostationary ocean colour satellite sensor that provides multi-spectral aerosol data in Northeast Asia (included eastern China, the Korea peninsula, and Japan) (Park et al., 2014; Xu et al., 2015a). GOCI provides hourly data at 500 m resolution 8 times a day from 9:00 to 16:00 Korean Standard time (KST). Xu et al. (2015a) examined PM<sub>2.5</sub> concentrations in eastern China using GOCI-derived AOD, coupled with GEOS-Chem simulation data, resulting in a strong correlation (R<sup>2</sup> = 0.66) with in-situ measurements in terms of annual mean concentrations.

In addition, recent studies have used PBLH, RH, wind speed, and other meteorological variables and land use information because these factors are related to PM concentrations, and thus can be used to improve estimation models (Gupta and Christopher, 2009a; Liu et al., 2009; Wu et al., 2012; Chudnovsky et al., 2014; You et al., 2015; Wu et al., 2016; Li et al., 2017b; Yeganeh et al., 2017). In this study, we adopted the machine learning approach, RF, to develop models estimating ground level PM<sub>10</sub> and PM<sub>2.5</sub> concentrations using satellite-derived products, numerical and emission model output, and ancillary spatial data over South Korea. Aerosol products retrieved from GOCI including AOD were used as key input variables. The objectives of this study are to (1) estimate ground-level PM<sub>10</sub> and PM<sub>2.5</sub> concentrations based on GOCI aerosol products and meteorological and emission model output data using RF; (2) validate the estimated PM concentrations using in-situ observation data; (3) compare the results to those when MODIS aerosol products were used instead of GOCI products, and (4) evaluate the proposed remote sensing-based models in comparison with the results from physical models such as GEOS-Chem and the Community Multiscale Air Quality Modelling System (CMAQ).

## 2 Study area and data

### 2.1 Study area

The study area was South Korea (latitude: 33°N-39°N, longitude: 124°E-131.5°E), located in northeast Asia, a region known to have relatively poor air quality. Our study area is located in the mid-latitude region where the prevailing westerlies carry particulates from the two most rapidly developing countries in Asia (i.e., China and India). The annual mean temperature of South Korea ranges from 10 to 15°C, and the annual precipitation ranges from 1000 to 1900 mm. More than half of the precipitation occurs in summer during the Asian monsoon. Wind direction is seasonal, with north-westerly winds prevailing in winter and south-westerly winds in summer.

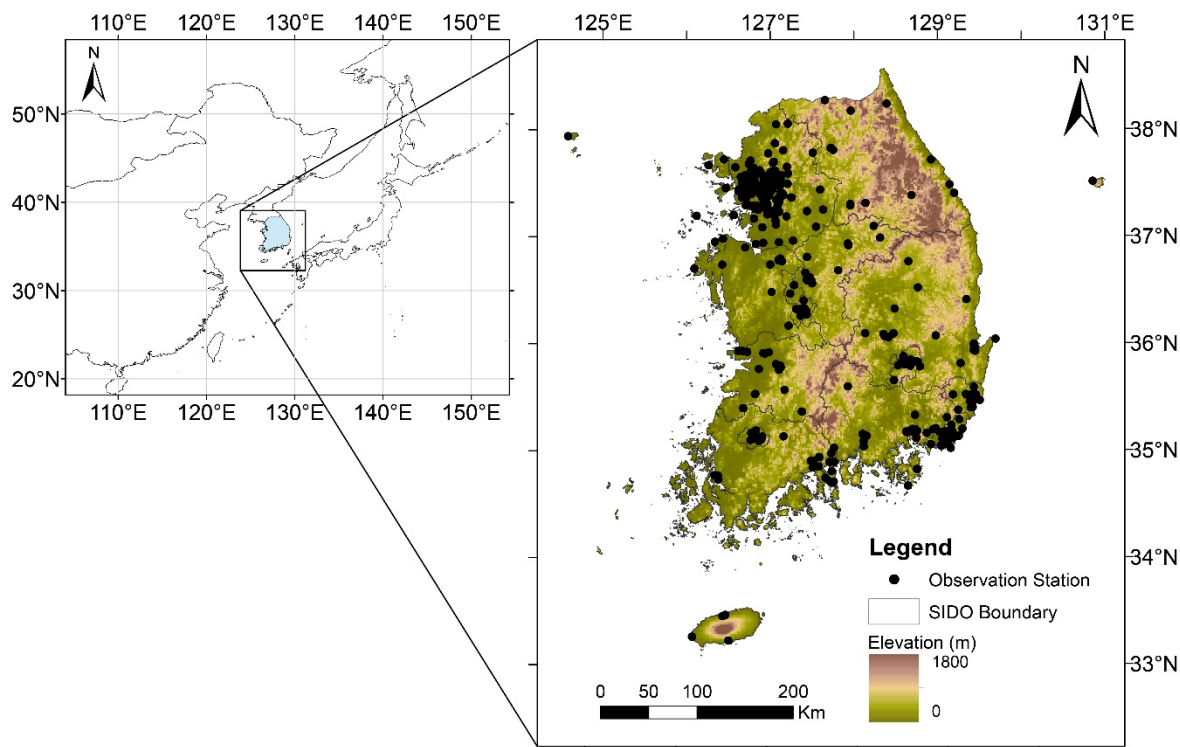

10 **Figure 1: Study area with particulate matter (PM) monitoring station sites in South Korea. Elevation is used as a background image.**



## 2.2 Data

Data used in this study are ground observations as the target variable, and remote sensing data, model-based data, and other ancillary spatial data as explanatory variables. We selected the explanatory variables considering the recent literature that estimated ground PM concentrations (He and Huang, 2018; Chen et al., 2018; Brokamp et al., 2018), which are explained in the following sections.

### 2.2.1 Observation data

PM observation data (i.e. PM<sub>10</sub> and PM<sub>2.5</sub>) in South Korea were obtained from the AirKorea website (<https://www.airkorea.or.kr/>) for the period from 2015 to 2016. A total of 325 stations are distributed throughout the country with a concentration in metropolitan areas such as the Seoul Metropolitan Area (SMA) (Figure 1). Hourly concentrations of air pollutants such as PM<sub>10</sub> and PM<sub>2.5</sub> are provided as real time data. PMs at stations are measured based on a beta attenuation monitoring (BAM) technique which is widely used for automatic air monitoring (Zhan et al., 2017; Zhao et al., 2016). The measurement results are expressed as mass concentration per unit volume (i.e.,  $\mu\text{g}/\text{m}^3$ ) converted to room temperature (20 °C, 1 atm). Currently, PM<sub>10</sub> data are provided at 316 stations while PM<sub>2.5</sub> are measured at 194 stations.

### 2.2.2 Remote sensing data

Various remote sensing data were used in this study such as GOCI aerosol products, MODIS Normalized Difference Vegetation Index (NDVI), land cover product, Global Precipitation Measurement (GPM) 30-min precipitation data, and the Shuttle Radar Topography Mission (SRTM) elevation data. GOCI is a geostationary satellite imaging sensor onboard the Communication, Ocean, and Meteorological Satellite (COMS), which was launched in June 2010. It covers 2500 km x 2500 km over the East Asia region and 8 images collected at 6 visible and 2 NIR bands per day provided hourly from 09:00 to 16:00 in local time (KST). GOCI aerosol products are derived by GOCI Yonsei aerosol retrieval (YAER) version 2 algorithm (Choi et al., 2018). Four types of products were used in this study: AOD at 550 nm, fine-mode fraction (FMF) at 550nm, single scattering albedo (SSA) at 440 nm, and Ångström exponent (AE) at 440 and 870 nm with 6 km x 6 km of spatial resolution (Table 1).

The MODIS satellite instrument, onboard the Terra and Aqua satellites, acquires data in 36 spectral bands ranging from 0.4 to 1.4  $\mu\text{m}$  in wavelength. The 16-days NDVI with 1 km resolution (MYD13A2; Solano et al., 2010), Aerosol 5-min L2 swath data with 3km resolution (MYD04\_3K; Levy et al., 2013) products from 2015 to 2016, and the yearly land cover type product with 500 m resolution (MCD12Q1; Friedl et al., 2010) in 2013 were obtained from Reverb Echo (<https://reverb.echo.nasa.gov/reverb/>). Urban area ratios were calculated using land cover data based on the 13 x 13 neighbourhood pixels, which were similar to the spatial resolution of GOCI AOD products. MODIS Aerosol product was used for comparison with GOCI AOD data.

The GPM (Huffman et al., 2015) developed by the National Aeronautics and Space Administration (NASA) and the Japanese Aerospace Exploration Agency (JAXA) was launched in February 2014 to provide observations of rain and snow worldwide. Half-hourly precipitation data with 0.1-degree resolution (3IMERGHH) were obtained from Goddard Earth Science Data and Information Service Centre (GES DISC; <https://mirador.gsfc.nasa.gov/>). Half-hourly precipitation data were provided as precipitation rates with mm/hr and used to calculate 24-hour accumulated precipitation data for every hour.

The SRTM (Farr et al., 2007) was launched as a payload on the STS-99 mission of the Space Shuttle Endeavour to generate a global digital elevation model (DEM) of the Earth. SRTM DEM data were acquired using the radar interferometry based on the C-band Spaceborne Imaging Radar (SIR-C) and the X-band Synthetic Aperture Radar (X-SAR) hardware. The elevation data were provided at 1 arc-second (about 30 meters) and 3 arc-second (about 90 meters) of spatial resolution for global coverage from the U.S. Geological Survey (USGS) EarthExplorer website (<https://earthexplorer.usgs.gov/>). In this study, 3 arc-second data were used and resampled to the same resolution as the MODIS data with 1 km of spatial resolution (Table 1).

**Table 1: Remote sensing data used to develop models estimating ground-level particulate matter concentrations in this study.**

| Product              | Spatial resolution | Temporal resolution | Variables                                     | Description                                                                                           |
|----------------------|--------------------|---------------------|-----------------------------------------------|-------------------------------------------------------------------------------------------------------|
| GOCI<br>AOD_550nm    | 6 km               | 8/day               | Aerosol Optical Depth (AOD)                   | The measure of the extinction of the solar radiation by aerosols (e.g., dust, haze, and sea salt)     |
| GOCI<br>FMF_550nm    | 6 km               | 8/day               | Fine Mode Fraction (FMF)                      | The ratio of small size aerosols (radii between 0.1 and 0.25) to the total aerosols                   |
| GOCI<br>SSA_440nm    | 6 km               | 8/day               | Single Scattering Albedo (SSA)                | The measure of the amount of aerosol light extinction due to scattering                               |
| GOCI<br>AE_440_870nm | 6 km               | 8/day               | Ångström Exponent (AE)                        | The exponent related with particle size (The smaller the particles, the bigger the Ångström Exponent) |
| MODIS<br>MYD13A2     | 1 km               | 16 days             | Normalized Difference Vegetation Index (NDVI) | The indicator denoting vegetation quantification                                                      |
| MODIS<br>MCD12Q1     | 500 m              | yearly              | Land Cover Type (Urban area ratio)            | The ratio of urban area to 6 km x 6 km neighbourhood of each pixel                                    |

|                     |      |        |                                  |                                                                                                  |
|---------------------|------|--------|----------------------------------|--------------------------------------------------------------------------------------------------|
| GPM<br>3IMERGHH     | 0.1° | 30 min | Precipitation                    | The 24-h accumulated precipitation produced using 30 minutes 3MERGHH precipitation data from GPM |
| SRTM<br>Void Filled | 90 m | -      | Digital Elevation Model<br>(DEM) | The 2D representation of topographic surface                                                     |

### 2.2.3 Model-based data

Along with satellite-based data, the outputs from three models were combined. The three models were: the Regional Data Assimilation and Prediction System (RDAPS), the Sparse Matrix Operator Kernel Emissions (SMOKE), and the Breathing Earth System Simulator (BESS). The RDAPS (Davies et al., 2005) is one of the numerical weather forecast models used by the Korea Meteorological Administration, which is based on the Unified Model (UM) developed by the United Kingdom Met Office. The analysis-forecast products with about a hundred variables are generated with 12 km of spatial resolution and 70 vertical layers. They are provided four times a day (03:00, 09:00, 15:00, 21:00 KST) for 87-hour forecasts with 3-hour time steps. A total of 7 variables in UM RDAPS analysis data (i.e., temperature, dew-point temperature, RH, maximum wind speed, visibility at the height above the ground, and PBLH and surface pressure) were used as meteorological input variables in this study. These meteorological variables are commonly used to estimate ground-level PM concentrations (Lv et al., 2017; He and Huang, 2018).

The SMOKE (Baek et al., 2009) is based on emission inventories generally provided as an annual total emission amount for each emission source. Hourly emission data with 9 km spatial resolution were obtained from the National Institute of Environmental Research (NIER). Among the 47 chemical composition parameters in SMOKE outputs, 14 PM-related emission data parameters (i.e., ISOPRENE, TRP1, CH4, NO, NO2, NH3, HCOOH, HCHO, CO, SO2, POA, PNO3, PSO4 and PMFINE) were used in this study. The selected parameters are mostly those defined by Aerosol Emission 5 (AE5) as major precursors forming the PM (Xu et al., 2015b; van Zelm et al., 2016; Gao et al., 2016).

The BESS (Ryu et al., 2018) is the MODIS-based model that couples atmosphere and canopy radiative transfers, photosynthesis, transpiration, and energy balance. It includes an atmospheric radiative transfer model and an ANN approach with MODIS atmospheric products. Daily BESS shortwave radiation products with 5 km spatial resolution were obtained from the Environmental Ecology Lab at Seoul National University ([http://environment.snu.ac.kr/bess\\_rad/](http://environment.snu.ac.kr/bess_rad/)).

### 2.2.4 Other input variables

Population density by region (obtained from the Statistical Geographic Information Service (SGIS; <https://sgis.kostat.go.kr/>)) and Day of Year (DOY) were used as additional input variables together with remote sensing and model-based meteorological and emission variables. Population density was calculated for each administrative division, in which a unit is the number of

people per square kilometre, and then converted to raster with a 1 km grid. In this study, DOY was converted to values ranging from -1 to 1 with a one-year period using a sine function considering seasonality (i.e., setting the middle of summer as 1 and the middle of winter as -1; Stolwijk et al., 1999). Road network data were not used in this study, as the use of the road data often yielded inaccurate results over non-urban areas in our preliminary analyses.

## 5 2.2.5 Data pre-processing

A total of 32 input variables from satellite and model-based data were used for the estimation of ground-level PM concentrations in the RF machine learning. All data collected at 13:00 KST were used to develop PM estimation models to match the acquisition time of MODIS Aqua aerosol products over the study area. The observed PM concentrations (i.e., target variables) were log-transformed **because the concentration range is large and has a positively skewed distribution**. To ensure the reliability of GOCI-derived aerosol products, the four rule-based filters used in Choi (2017) were applied: buddy check, local variance check, sub-pixel cloud fraction check, and diurnal variation check. The same NDVI values during the interval of MODIS 16-days NDVI were used in the models. GPM precipitation data were converted into 24-hour accumulated precipitation data using 48 half-hourly data prior to the target time (i.e., hourly). UM RDAPS reanalysis data were linearly interpolated using analysis fields at 09:00 and 15:00 KST. DEM, urban area ratio and population density data were used as constant variables during the study period. Input data with different spatial resolutions were resampled to a 1 km MODIS grid using bilinear interpolation. A total of 32 input variables and their abbreviations are summarized in Table 2.

**Table 2: List of input variables (and their abbreviations) used to estimate ground-level particulate matter concentrations.**

| Data                                | Variables                                        | Abbreviations |
|-------------------------------------|--------------------------------------------------|---------------|
| Satellite-based remote sensing data | Aerosol Optical Depth                            | AOD           |
|                                     | Fine Mode Fraction                               | FMF           |
|                                     | Single Scattering Albedo                         | SSA           |
|                                     | Ångström Exponent                                | AE            |
|                                     | Normalized Difference Vegetation Index           | NDVI          |
|                                     | Urban area ratio                                 | Urban_ratio   |
|                                     | 24-hour Accumulated Precipitation                | Precip        |
|                                     | Digital Elevation Model                          | DEM           |
| Model-based meteorological data     | Temperature at the height above ground           | Temp          |
|                                     | Dew-point temperature at the height above ground | Dew           |
|                                     | Relative humidity at the height above ground     | RH            |
|                                     | Pressure surface                                 | P_srf         |

|                           |                                                      |            |
|---------------------------|------------------------------------------------------|------------|
|                           | 3-hour maximum wind speed at the height above ground | MaxWS      |
|                           | Planetary Boundary Layer Height                      | PBLH       |
|                           | Visibility at the height above ground                | Visibility |
|                           | Solar Radiation                                      | RSDN       |
| Model-based emission data | ISOPRENE (C <sub>5</sub> H <sub>8</sub> )            | ISOPRENE   |
|                           | Monoterpene (C <sub>10</sub> H <sub>16</sub> )       | TRP1       |
|                           | Methane (CH <sub>4</sub> )                           | CH4        |
|                           | Nitric oxide (NO)                                    | NO         |
|                           | Nitrogen dioxide (NO <sub>2</sub> )                  | NO2        |
|                           | Ammonia (NH <sub>3</sub> )                           | NH3        |
|                           | Formic acid (HCOOH)                                  | HCOOH      |
|                           | Formaldehyde (HCHO)                                  | HCHO       |
|                           | Carbon monoxide (CO)                                 | CO         |
|                           | Sulfur dioxide (SO <sub>2</sub> )                    | SO2        |
|                           | Primary organic aerosol                              | POA        |
|                           | Primary nitrate                                      | PNO3       |
|                           | Primary sulfate                                      | PSO4       |
|                           | Other primary PM <sub>2.5</sub>                      | PMFINE     |
| Ancillary data            | Population density                                   | PopDens    |
|                           | Converted Day of Year                                | DOY        |

### 3 Methodology

The process flow diagram for the estimation of ground-level PM concentrations is shown in Figure 2. The constructed data were divided into two groups by date: 80% of the data were used for model development and the remaining 20% were used for hindcast validation considering data distribution by PM concentration levels. The data for model development were again randomly divided into training (80%) and test (20%) datasets. Since PM reference data had a skewed distribution (i.e., a number of low concentration samples and a few high concentration samples), oversampling and subsampling approaches were conducted only for the training dataset to avoid over- or under-estimation due to biased sample distribution. Then, the RF machine learning method was applied to the training datasets to develop the models for estimating ground-level PM concentrations.

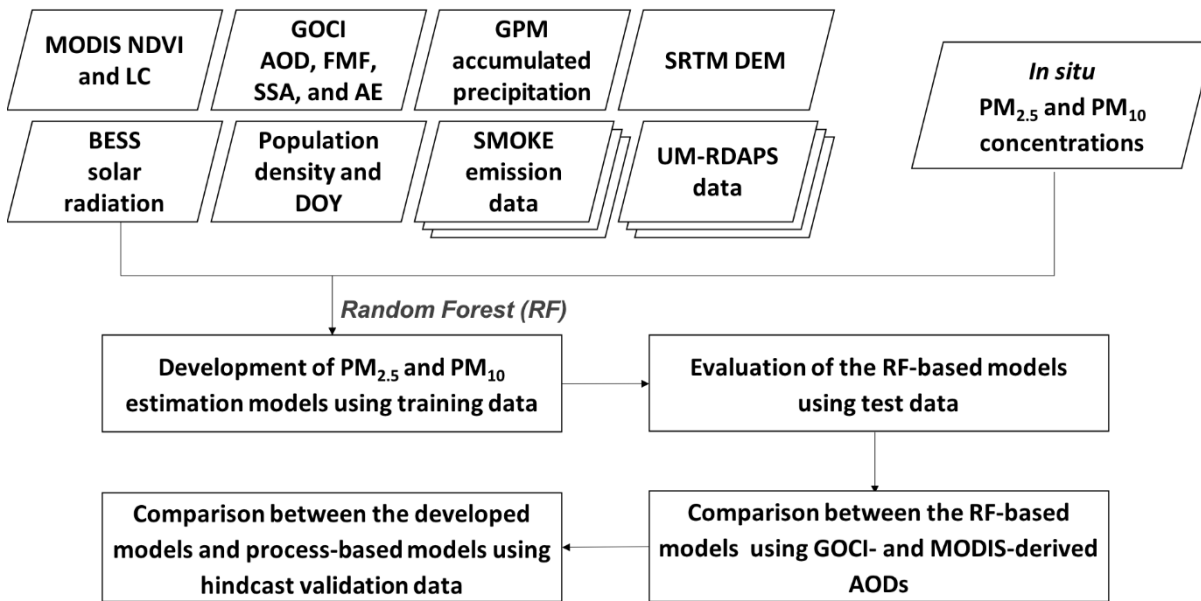

Figure 2: Process flow diagram of the estimation of ground level particulate matter concentrations proposed in this study.

### 3.1 Oversampling and Subsampling

Many of the in-situ observation data used in this study showed low concentrations, while there were a relatively small number of observations of high concentrations. This imbalance in samples could result in biased estimation with a significant underestimation of high concentration data. Thus, over- and sub-sampling approaches were conducted for the training datasets to overcome the problem caused by the unbalanced samples (Table 3).

The oversampling approach is based on the assumption that the PM concentration of a training sample (i.e., at a pixel) is not significantly different from those of its neighbouring pixels. The pixels within a circular window with a radius of 3 pixels (i.e., 37 pixels including the focus cell) were considered as potential neighbouring pixels with sorting the proximity to the centre (see Supplementary Figure 1). First, the intervals of 30  $\mu\text{g}/\text{m}^3$  and 20  $\mu\text{g}/\text{m}^3$  were applied to the PM<sub>10</sub> and PM<sub>2.5</sub> samples, respectively. The second groups (i.e., 30-60  $\mu\text{g}/\text{m}^3$  for PM<sub>10</sub> and 20-40  $\mu\text{g}/\text{m}^3$  for PM<sub>2.5</sub>) had the largest sample size, and thus the subsampling approach based on simple random sampling (i.e., 50%) was applied to the second groups. For the other groups, we multiplied an integer value ranging from 1 to 37 by the sample size of each group to produce a more balanced sample distribution (i.e., the smaller the sample size, the larger the integer), and then oversampling based on the ordered neighbouring pixels was performed. Input variables in the adjacent pixels of high concentration samples were extracted with the corresponding target variables (i.e., PM<sub>2.5</sub> and PM<sub>10</sub>) randomly perturbed within 5% of the focus pixel concentrations. This oversampling approach can effectively reduce underestimation of high PM concentrations resulting from the small training sample size of high concentration data.

**Table 3: The number of samples for training, test, and hindcast validation datasets. The adjusted sample size for training data was determined through the over-/sub-sampling approaches.**

|                   | Training dataset |          | Test dataset | Hindcast validation dataset |
|-------------------|------------------|----------|--------------|-----------------------------|
|                   | Original         | Adjusted |              |                             |
| PM <sub>10</sub>  | 7919             | 14201    | 1545         | 3906                        |
| PM <sub>2.5</sub> | 3038             | 5738     | 776          | 1364                        |

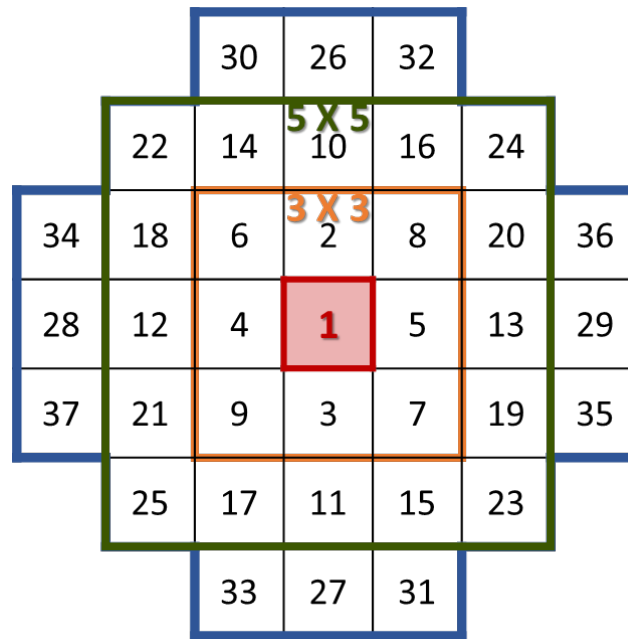

- 5 **Supplementary Figure 1: The pixels within the circular neighbouring window with a radius of 3 pixels considered for oversampling. The number in each pixel indicates the order of inclusion of the pixel for oversampling. For example, oversampling for pixels of an interval might be conducted for first three pixels following the order, while oversampling for pixels of another interval might be conducted for up to the 13<sup>th</sup> pixel within the window.**

### 10 3.2 Machine learning approach (Random Forest; RF)

RF is an ensemble model based on classification and regression trees (CART) with randomized node optimization and bootstrap aggregating (aka bagging; Breiman, 2001). RF generates numerous independent trees to overcome the limitations of a single decision (or regression) tree method, such as the dependency on a single tree and the problem of overfitting the training data, resulting in better performance than single CARTs (Kim et al., 2015; Lee et al., 2016). A multitude of independent trees are ensembled to reach a solution by majority voting for classification or averaging for regression (e.g., Amani et al., 2017; Im et al., 2016). RF provides information on how a variable contributes to model development using out-of-bag (OOB) data that



are not used in training a model (Sonobe et al., 2017; Park et al., 2017). When a variable from OOB data is randomly permuted, the change in mean square error in percentage is calculated (Breiman, 2001). The larger the increase in the error for a variable, the more contributing the variable is. RF was applied to the training data to develop the models for estimating ground-level PM concentrations. The models were evaluated using the test and hindcast validation data.

5

### 3.3 Model evaluation

Accuracy assessment of the developed models were conducted using the test and hindcast validation datasets based on the five metrics—coefficient of determination ( $R^2$ ), RMSE, relative RMSE (rRMSE), mean bias (MB), and mean error (ME). rRMSE, MB, and ME are calculated as:

$$10 \quad \text{rRMSE} = \frac{\text{RMSE}}{\bar{y}} \times 100 \%, \quad (1)$$

$$\text{MB} = \frac{1}{N} \sum_{i=1}^N (f_i - y_i) \quad (2)$$

$$\text{ME} = \frac{1}{N} \sum_{i=1}^N |f_i - y_i| \quad (3)$$

where  $y_i$  is the observed data,  $\bar{y}$  is the mean of the observed data,  $f_i$  is an estimated value, and  $N$  is the number of observations. The rRMSE is the RMSE normalized by the mean value of observed data, which is useful for comparing results with different scales. The MB and ME are the averages of variation between the model-derived and observed values, with the exception that ME uses only absolute difference. The MB presents a tendency of overestimation or underestimation by a given model. The ME is the difference between observation and estimation (Boylan and Russell, 2006).

### 3.4 Comparison with other approaches

MODIS AOD is one of the widely used satellite-based aerosol products, and has often been used to estimate PM concentrations. The developed RF models were compared with those using MODIS AOD instead of GOCI aerosol products. Unlike GOCI, MODIS only provides AOD with 3 km resolution (i.e., MYD04\_3K) over land. AOD was used for developing MODIS-based models without incorporating other aerosol-related variables (i.e., AE, FMF and SSA). In order to compare the performance between MODIS- and GOCI-based RF models, 50 % of the samples that were commonly included in both MODIS and GOCI datasets were used to develop the models, while the remaining samples were used to validate the models.

25 In addition, the ground-level PM concentrations predicted using the GOCI-based RF models were compared to the simulated and predicted results by GEOS-Chem and CMAQ models. The GEOS-Chem v10-01 was utilized with the Global Forecast System (GFS; produced by the National Centres for Environmental Prediction (NCEP)) as meteorological fields, and MIX Asian emission inventory as emissions. The CMAQ model version 4.7.1 was used to simulate the ground-level  $\text{PM}_{10}$  and  $\text{PM}_{2.5}$  concentrations. Meteorological fields simulated by the Weather Research and Forecasting (WRF) model and emission data from the SMOKE model were utilized to run the CMAQ model. The comparison among the GOCI-based model, GEOS-Chem,

30

and CMAQ to in situ measurements, was conducted using the hindcast validation dataset. For comparison to in situ measurements, the results from the GOCI-based models were resampled to the GEOS-Chem grid with  $0.25^\circ \times 0.3125^\circ$  from January to September 2016, and to the CMAQ grids with  $9 \text{ km} \times 9 \text{ km}$  for 2015-2016. The approach by van Donkelaar et al. (2010) that uses the ratio between the ground-level data and total column of AOD to satellite-based AOD (i.e., here GOCI AOD) using the vertical profile of AOD from GEOS-Chem was adopted to predict ground-level PM concentrations (i.e., GOCI-GEOS-Chem fused PM estimation).

## 4 Results and discussion

### 4.1 Performance of the RF models

The evaluation results of the developed models for estimating  $\text{PM}_{10}$  and  $\text{PM}_{2.5}$  concentrations using the test datasets over South Korea are presented in Table 4. The models (the improved models hereafter) based on the balanced training samples through over-/sub-sampling, resulted in  $R^2$  values of 0.78 and 0.73, and RMSEs of  $17.08 \mu\text{g}/\text{m}^3$  and  $8.25 \mu\text{g}/\text{m}^3$  for  $\text{PM}_{10}$  and  $\text{PM}_{2.5}$ , respectively. There was a significant improvement in using the balanced training samples instead of the original samples (decrease of RMSE  $\sim 30\%$  and rRMSE  $\sim 10\%$ ). MB and ME also confirmed that the balanced samples improved the models estimating ground level PM concentrations (Table 3; Figure 3). In particular, high concentration data (over  $150 \mu\text{g}/\text{m}^3$  for  $\text{PM}_{10}$  and  $50 \mu\text{g}/\text{m}^3$  for  $\text{PM}_{2.5}$ ) were well estimated by the improved models. The slopes of the trends were also improved from 0.46-0.48 to 0.77-0.78. The slopes were still lower than 1, which is due to the slight overestimation of low PM concentration data (Figure 3). This significant improvement in the estimation performance was mainly due to the proposed sampling strategies in order to use more balanced training data. The use of the balanced training data resulted in the huge increase of the estimation accuracy of ground-level PM concentrations especially for high concentration samples at the compensation of slight accuracy decrease for low concentrations.

Although it is not possible to directly compare the present results with those from other studies, the results from this study agreed well with those from recent literature that used machine learning approaches for estimating PM concentrations (Gupta et al., 2009b; Wu et al., 2012; Li et al., 2017a; Yeganeh et al., 2017; Hu et al., 2017b; Chen et al., 2018). Hu et al. (2017b) estimated surface  $\text{PM}_{2.5}$  concentrations using RF, resulting in the cross validation  $R^2$  of 0.8 and RMSE of  $2.83 \mu\text{g}/\text{m}^3$ . Similarly, Chen et al. (2018) compared three different methods (i.e., RF, generalized additive model (GAM), and non-linear exposure-lag-response model (NEM)) to estimate surface  $\text{PM}_{2.5}$  concentrations over China during 2014-2016. Their daily estimation results show cross validation  $R^2$  of 0.83, 0.55, and 0.51 for RF, GAM, and NEM, respectively, implying the robustness of machine learning compared to traditional statistical models. A geographically adjusted deep belief network (Geoi-DBN) was used to estimate  $\text{PM}_{2.5}$  over China and showed a good correlation with observation data ( $R^2 = 0.88$  and RMSE =  $13.68 \mu\text{g}/\text{m}^3$ ; Li et al., 2017a). The literature shows that empirical models using statistical and machine learning approaches often underestimate high PM concentrations (Wu et al., 2012; Li et al., 2017a). However, the RF-based models developed in our study has proved to be effective for modelling high ground-level PM concentrations.

**Table 4:** Accuracy assessment results of the RF-based models for estimating PM concentrations using the test datasets during 2015-2016.

|                                                 | R <sup>2</sup> | RMSE <sup>a</sup><br>( $\mu\text{g}/\text{m}^3$ ) | rRMSE <sup>b</sup><br>(%) | MB <sup>c</sup><br>( $\mu\text{g}/\text{m}^3$ ) | ME <sup>d</sup><br>( $\mu\text{g}/\text{m}^3$ ) | Slope | Intercept |
|-------------------------------------------------|----------------|---------------------------------------------------|---------------------------|-------------------------------------------------|-------------------------------------------------|-------|-----------|
| Model (with original training samples)          |                |                                                   |                           |                                                 |                                                 |       |           |
| PM <sub>10</sub>                                | 0.58           | 24.34                                             | 36.96                     | -5.24                                           | 15.41                                           | 0.48  | 28.94     |
| PM <sub>2.5</sub>                               | 0.59           | 10.53                                             | 36.46                     | -2.30                                           | 7.37                                            | 0.46  | 13.30     |
| Improved model (with balanced training samples) |                |                                                   |                           |                                                 |                                                 |       |           |
| PM <sub>10</sub>                                | 0.78           | 17.08                                             | 25.94                     | 2.93                                            | 12.78                                           | 0.78  | 17.16     |
| PM <sub>2.5</sub>                               | 0.73           | 8.25                                              | 28.58                     | 1.71                                            | 6.18                                            | 0.77  | 8.30      |

<sup>a</sup> Root Mean Square Error; <sup>b</sup> Relative Root Mean Square Error; <sup>c</sup> Mean Bias; <sup>d</sup> Mean Error

5 In addition, the seasonal variation of model performance for 2015 and 2016 is shown in Table 5. The R<sup>2</sup> values for PM<sub>10</sub> estimations are the highest (0.87) in winter with an RMSE of 12.78  $\mu\text{g}/\text{m}^3$  and the lowest (0.50) in summer with an RMSE of 12.62  $\mu\text{g}/\text{m}^3$ , as compared to R<sup>2</sup> values of 0.77 and 0.74 with RMSEs of 16.61  $\mu\text{g}/\text{m}^3$  and 13.07  $\mu\text{g}/\text{m}^3$  in fall and spring, respectively. The summer season resulted in relatively high rRMSE for estimating ground-level PM concentrations compared to the other seasons. This is mainly because ground-level PM concentrations are typically low in summer in South Korea. **The cloud contamination and the relatively small sample size in summer, might lead to estimation errors** (Shi et al., 2014; Sogacheva et al., 2017).

**Table 5:** Seasonal variation of model performance for estimating particulate matter (PM) concentrations. Spring, summer, fall, and winter correspond to March to May, June to August, September to November, and December to February, respectively.

|                   |        | R <sup>2</sup> | RMSE <sup>a</sup><br>( $\mu\text{g}/\text{m}^3$ ) | rRMSE <sup>b</sup><br>(%) | MB <sup>c</sup><br>( $\mu\text{g}/\text{m}^3$ ) | ME <sup>d</sup><br>( $\mu\text{g}/\text{m}^3$ ) | Slope | Intercept | Sample sizes (N) |
|-------------------|--------|----------------|---------------------------------------------------|---------------------------|-------------------------------------------------|-------------------------------------------------|-------|-----------|------------------|
| PM <sub>10</sub>  | Annual | 0.76           | 13.04                                             | 19.32                     | 3.09                                            | 9.83                                            | 0.75  | 19.78     | 18466            |
|                   | Spring | 0.74           | 13.07                                             | 17.77                     | 3.08                                            | 9.98                                            | 0.70  | 25.06     | 13132            |
|                   | Summer | 0.50           | 12.62                                             | 28.88                     | 0.33                                            | 9.23                                            | 0.48  | 22.95     | 928              |
|                   | Fall   | 0.77           | 16.61                                             | 26.69                     | 7.76                                            | 11.81                                           | 0.87  | 15.76     | 1564             |
|                   | Winter | 0.87           | 12.78                                             | 19.22                     | 3.71                                            | 9.20                                            | 0.87  | 12.29     | 2842             |
| PM <sub>2.5</sub> | Annual | 0.82           | 5.92                                              | 18.90                     | 1.36                                            | 4.42                                            | 0.81  | 7.21      | 7188             |
|                   | Spring | 0.82           | 5.90                                              | 19.01                     | 1.14                                            | 4.47                                            | 0.75  | 8.77      | 4510             |
|                   | Summer | 0.63           | 7.79                                              | 30.98                     | 3.15                                            | 6.20                                            | 0.61  | 12.97     | 712              |
|                   | Fall   | 0.85           | 8.12                                              | 27.50                     | 3.89                                            | 6.53                                            | 0.88  | 7.30      | 961              |
|                   | Winter | 0.79           | 7.94                                              | 20.99                     | 0.72                                            | 5.56                                            | 0.82  | 7.65      | 1005             |

<sup>a</sup> Root Mean Square Error; <sup>b</sup> Relative Root Mean Square Error; <sup>c</sup> Mean Bias; <sup>d</sup> Mean Error;

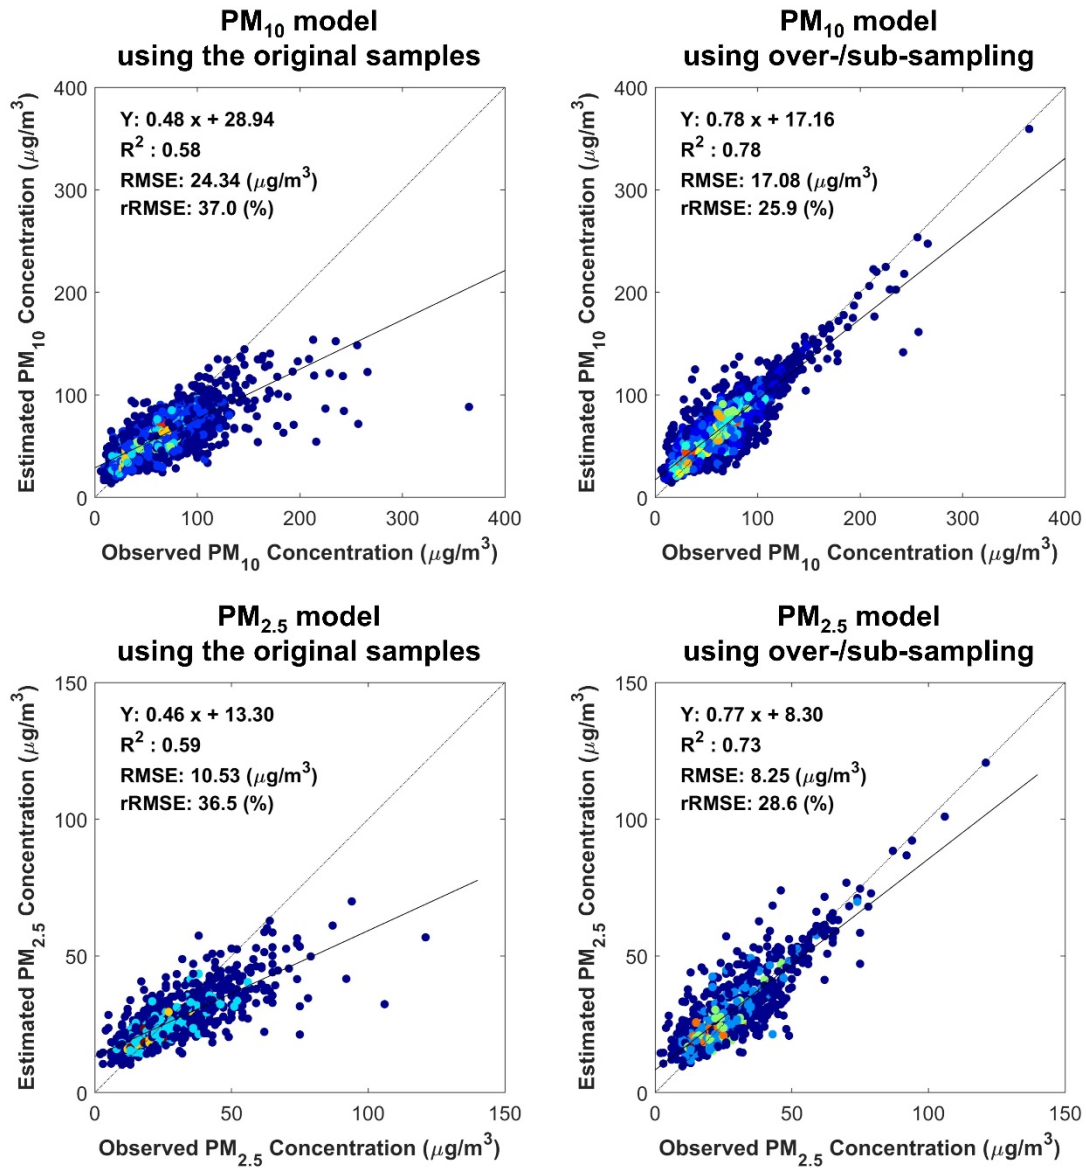

**Figure 3: The model test results of daily PM<sub>10</sub> and PM<sub>2.5</sub> estimations. The colour scheme from blue to red indicates the point density: The blue point means low density while the red point shows high density.**

5 Figure 4 depicts the top 10 input variables that were identified as the most contributing variables by the improved RF models for estimating PM<sub>10</sub> and PM<sub>2.5</sub> concentrations. The results indicate that AOD, DOY, MaxWS, RSDN, and Dew (i.e., dew-point temperature) were commonly identified as contributing variables by the RF models to estimate both ground-level PM<sub>10</sub> and

PM<sub>2.5</sub> concentrations. The AOD was identified as the most significant factor, which agreed well with the existing literature (Yu et al., 2017; Zang et al., 2017; Chen et al., 2018). Although most high PM concentration samples had high AOD values, some high PM samples had low AOD values. Careful examination of the samples shows that there were Asian dust events at low altitudes in those cases, which were not effectively included in the AOD derived from satellite sensor systems. In other words, the satellite-derived AOD has a weak sensitivity in capturing aerosols at low altitudes (Choi et al. 2018). This could be an error source, implying that altitude information of such dust events can be used to further improve the models for estimating ground-level PM concentrations.

Some meteorological variables indicating the atmospheric conditions also contributed to the estimation of ground-level PM concentrations in the improved models. There is a relationship between solar radiation and aerosols in which solar radiation reaching the surface increases with decreasing aerosol concentration (Préndez et al., 1995; Hu et al., 2017a; Borlina and Rennó, 2017). Prior studies noted that there is an inverse relationship between wind speed and both PM<sub>10</sub> and PM<sub>2.5</sub> (Gupta et al., 2006; Maraziotis et al., 2008; Krynicka and Drzeniecka-Osiadacz, 2013). This relationship causes an increase in PM concentrations under low wind speed conditions but a decrease under high wind speed conditions, which is also confirmed in the present study. This means that atmospheric conditions such as air stagnation have significant impacts on surface PM concentrations. The results correspond to previous studies (e.g., You et al., 2015; Yeganeh et al., 2017; Hu et al., 2017b; Yu et al., 2017) showing that meteorological factors are strongly effective in improving PM estimation models. Interestingly, the anthropogenic factors such as LC\_ratio (urban ratio), PopDens (population density), NH<sub>3</sub>, and SO<sub>2</sub> were more important for PM<sub>2.5</sub> estimation than PM<sub>10</sub>. This implies that the sources of PM<sub>2.5</sub> are mainly anthropogenic in South Korea (Moon et al., 2011; gon Ryou et al., 2018).

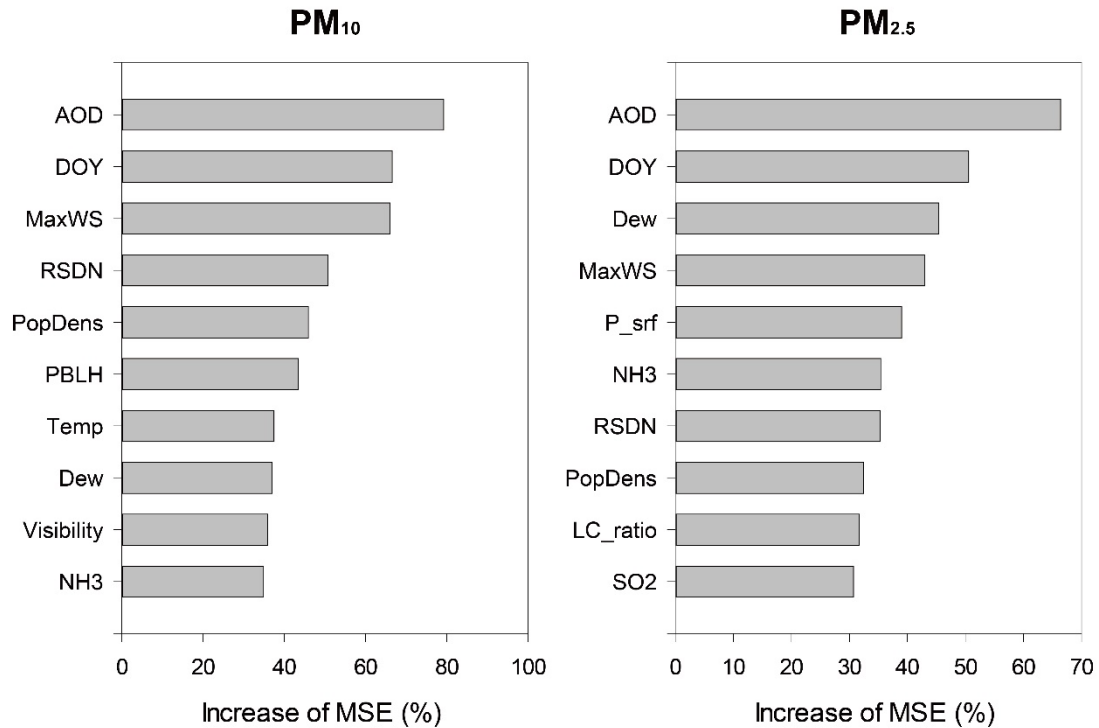

**Figure 4:** Variable importance of the top 10 input variables identified by the random forest models for estimating ground-level PM<sub>10</sub> and PM<sub>2.5</sub> concentrations.

#### 5 4.2 Spatial distribution of PM concentrations using the improved RF models

Figure 5 illustrates the spatial distribution of 2-year (2015-2016) averaged surface PM<sub>10</sub> and PM<sub>2.5</sub> concentrations at 1 km resolution with station-based in-situ PM<sub>10</sub> and PM<sub>2.5</sub> concentrations over South Korea. The pixels that have concentration values for more than 5 % of the period (> 36 days for the two years) were used to produce the spatial distribution maps to secure the reliability of the distribution. The predicted PM<sub>10</sub> and PM<sub>2.5</sub> have similar spatial patterns with relatively high concentrations for urban areas especially around metropolitan areas, and agree well with observed concentrations (Figure 5). The seasonal maps of PM<sub>10</sub> and PM<sub>2.5</sub> concentrations are also shown in Figure 6. South Korea has the rainy season usually in June and July. For this reason, cloud contaminants are much more significant in the summer than the other seasons, which resulted in many no data pixels for the summer maps (Figure 6). The ground-level PM concentrations in the spring and winter are much higher than in summer and fall for PM<sub>10</sub>. The results agree well with the general seasonal patterns of PM<sub>10</sub> concentrations of South Korea, where PM concentrations are much higher in spring due to Asian dust inflow carried by

westerly winds (Park and Shin, 2017). In addition, anthropogenic emissions generally increase PM concentrations in winter (Lu et al., 2011b; Li et al., 2016). The seasonal distribution of  $PM_{2.5}$  concentrations is similar to that of  $PM_{10}$ . However, high concentrations were predominantly found in fall for  $PM_{2.5}$ . The cold Siberian high pressure might explain this. When warm air from the south flows into the study area, and while the force of the Siberian anticyclone stops, an inversion layer is formed.

- 5 Then, PM is trapped because the atmospheric circulation becomes stagnant. Another reason can be explained by the relative overestimation of  $PM_{2.5}$  by the RF model in the fall season (Table 5). MB was greatest for the fall season among the four seasons indicating overestimation of  $PM_{2.5}$ . A more careful data configuration between training and test samples with larger sample size may mitigate such an overestimation.

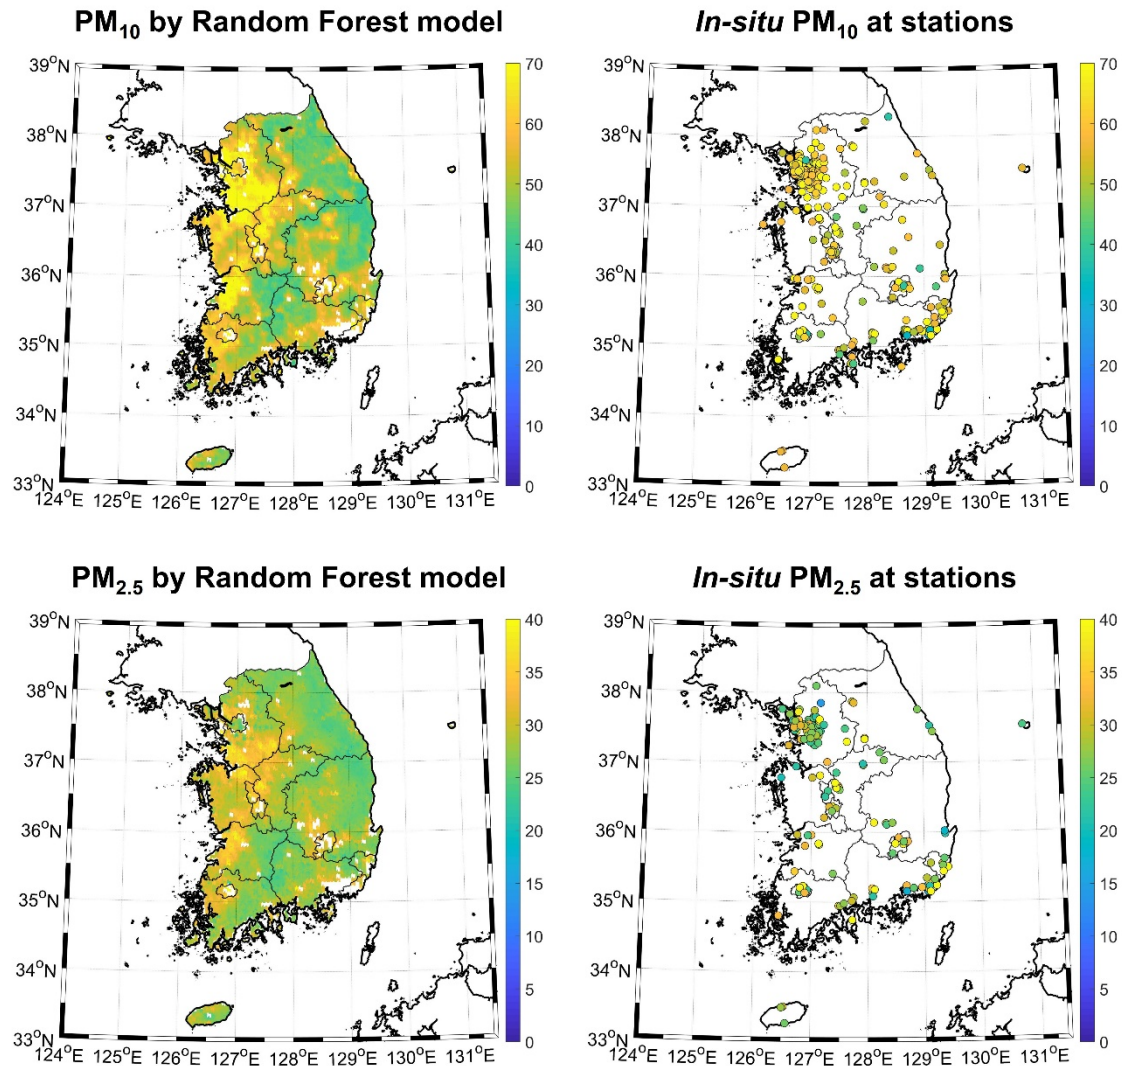



**Figure 5: Maps of two-year averaged particulate matter concentrations: PM<sub>10</sub> and PM<sub>2.5</sub> by the RF model (left column), and *in situ* PM<sub>10</sub> and PM<sub>2.5</sub> (right column).**

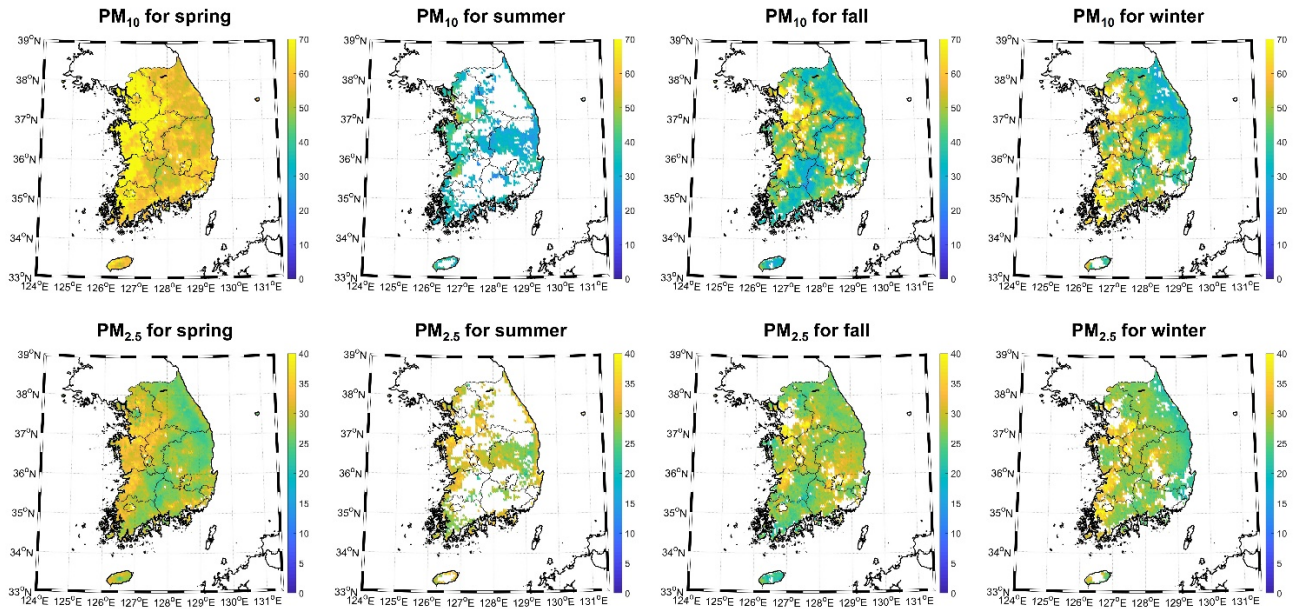

**Figure 6: Spatial distributions of seasonal mean particulate matter concentrations (first row for PM<sub>10</sub> and second row for PM<sub>2.5</sub>).**

5

### 4.3 Comparison of ground PM concentrations based on GOCI and MODIS AODs

The existing studies have generally used MODIS-derived AOD to estimate surface PM concentrations for various countries because of its global coverage and high quality (Remer et al., 2006; Gupta et al., 2009a, b; Van Donkelaar et al., 2010; Wang et al., 2010; Chudnovsky et al., 2014; You et al., 2015; Hu et al., 2017b; Yu et al., 2017; He and Huang, 2018). In this section, the estimated ground-level PM<sub>10</sub> and PM<sub>2.5</sub> concentrations are compared based on GOCI AOD and MODIS AOD. Figure 7 displays the scatterplots showing the cross-validation results of the RF-based models using GOCI-derived and MODIS-derived AODs. Although there was no statistically significant difference between the two types of models through ANOVA tests, the GOCI-based RF models produced slightly better accuracy metrics (i.e., R<sup>2</sup>, RMSE, and rRMSE) than MODIS-based RF models for estimating ground-level PM concentrations. When compared ground PM concentrations to AODs derived from the two sensor data (i.e., MODIS and GOCI), GOCI-derived AOD showed slightly higher correlation with the ground PM concentrations than MODIS-derived one (Supplementary Figure 2). Considering the advantages of GOCI as a geostationary satellite sensor (i.e., moderate spatial and temporal resolutions; 8 times a day with a 6 km grid size of the aerosol product), it is very promising to use GOCI-derived products as input to PM estimation models. It should also be noted that GOCI-2, which

15

has enhanced sensor specifications (i.e., 10 data collections per day at 3 km spatial resolution of the aerosol product) is planned to be launched in 2019.

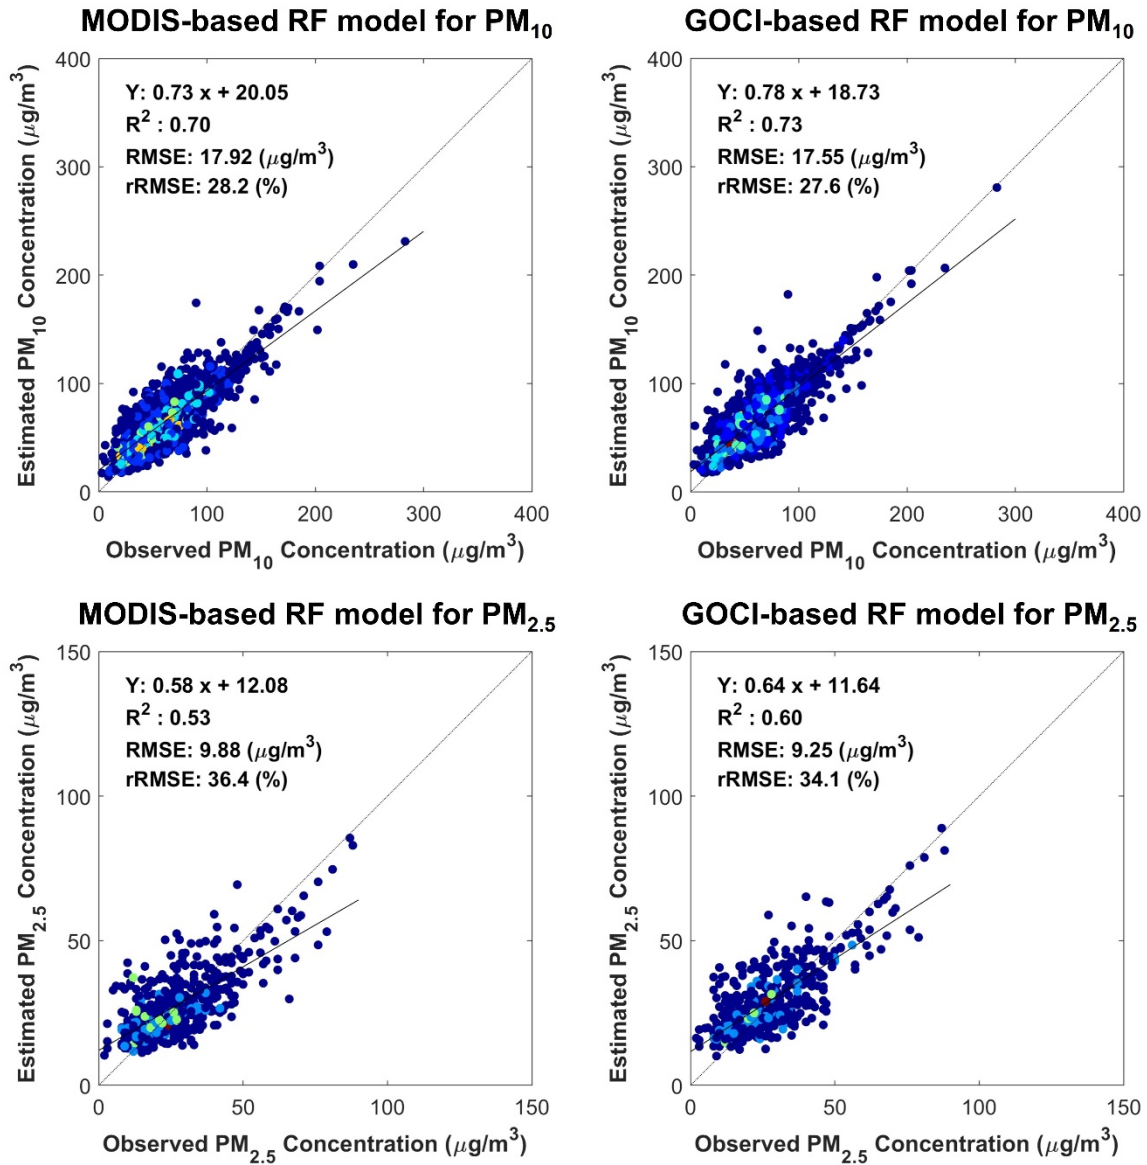

5 **Figure 7:** Scatterplots between the estimated and observed particulate matter concentrations when using MODIS- vs. GOCI-based models.

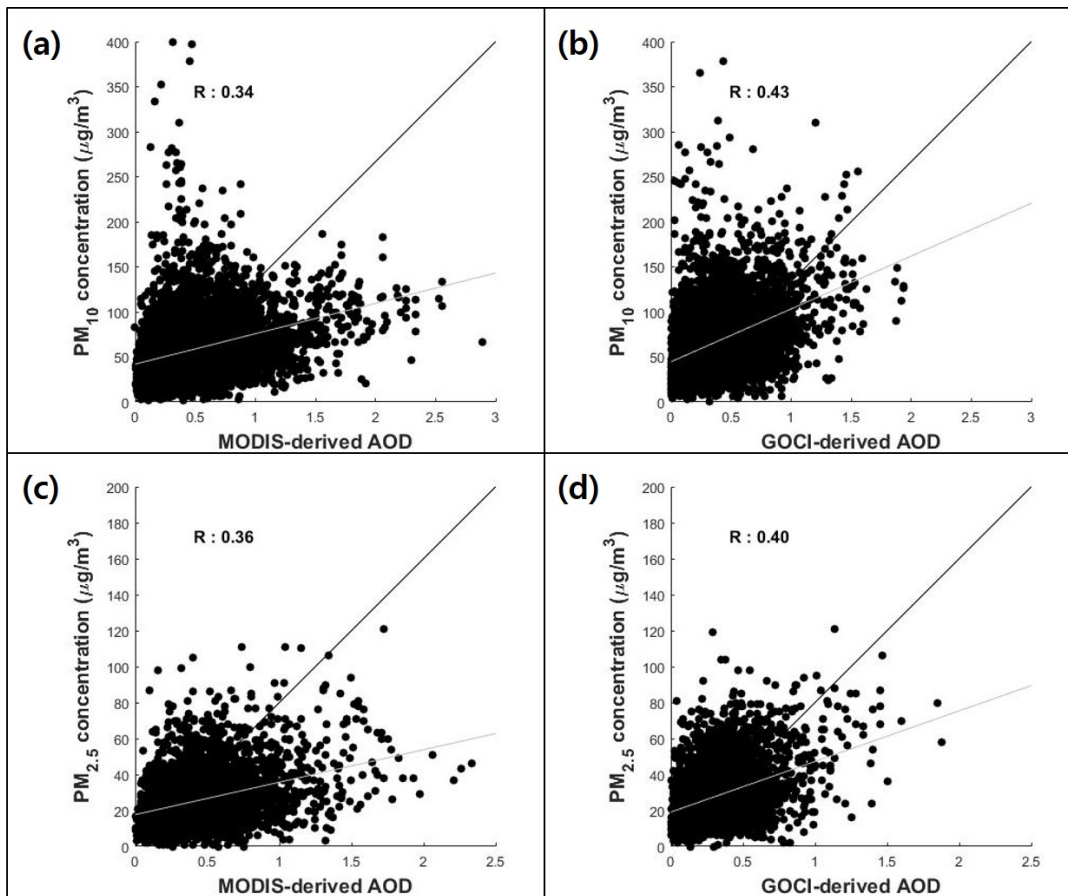

**Supplementary Figure 2: Comparison of PM concentrations to MODIS-derived AOD (left column) and GOCI-derived AOD (right column), (a) comparison between PM<sub>10</sub> and MODIS-derived AOD, (b) comparison between PM<sub>10</sub> and GOCI-derived AOD, (c) comparison between PM<sub>2.5</sub> and MODIS-derived AOD, (d) comparison between PM<sub>2.5</sub> and GOCI-derived AOD.**

#### 4.4 Comparison with the process-based models

The RF-based models for estimating ground-level PM<sub>10</sub> and PM<sub>2.5</sub> concentrations were further compared with process-based models, i.e., GEOS-Chem and CMAQ. Figure 8 shows the comparison of the accuracy metrics of the three models: the GEOS-Chem simulated, GOCI-GEOS-Chem fused, and the RF-predicted PM concentrations using the hindcast validation datasets (Table 3). The GOCI-GEOS-Chem fused PM<sub>10</sub> concentrations have less errors than the GEOS-Chem simulated PM<sub>10</sub> concentration, which agrees well with the existing literature. However, both tend to significantly underestimate the ground-level PM<sub>10</sub> concentrations when compared to the proposed RF models. **Consequently, the proposed RF models have the lowest RMSE, MB, and ME among those models.** Although the results of GOCI-GEOS-Chem fused PM<sub>2.5</sub> showed that R<sup>2</sup> (GEOS-Chem PM<sub>2.5</sub>: 0.00, GOCI-GEOS-Chem fused PM<sub>2.5</sub>: 0.14) and slope (GEOS-Chem PM<sub>2.5</sub>: -0.02, GOCI-GEOS-Chem fused PM<sub>2.5</sub>: 1.41) improved more than those of GEOS-Chem PM<sub>2.5</sub>, the RMSE, MB, and ME of the fused model were higher than

the GEOS-Chem model because the fused model overestimated PM concentrations. The RF models also produced better performance than CMAQ for estimating both PM<sub>10</sub> and PM<sub>2.5</sub> concentrations (Figure 9). Similar to the GEOS-Chem models, CMAQ tends to underestimate PM concentrations showing a large negative MB value.

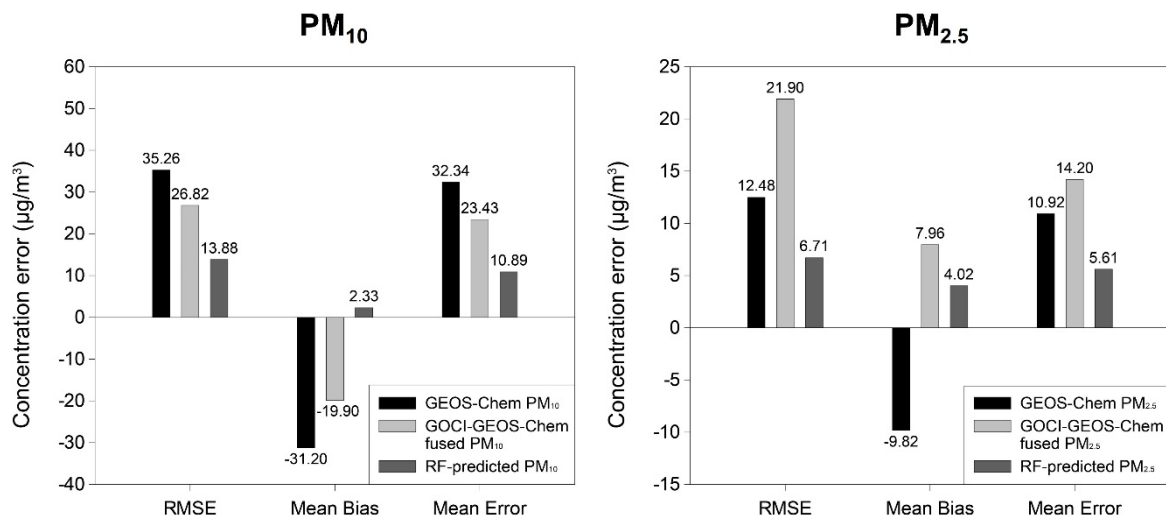

5 **Figure 8:** Comparison of the three models (i.e., GEOS-Chem based, GOCI-GEOS-Chem fused, and the present RF-based models) using the hindcast validation data for estimating particulate matter concentrations: PM<sub>10</sub> and PM<sub>2.5</sub> with Root Mean Square Error (RMSE), Mean Bias (MB), and Mean Error (ME).

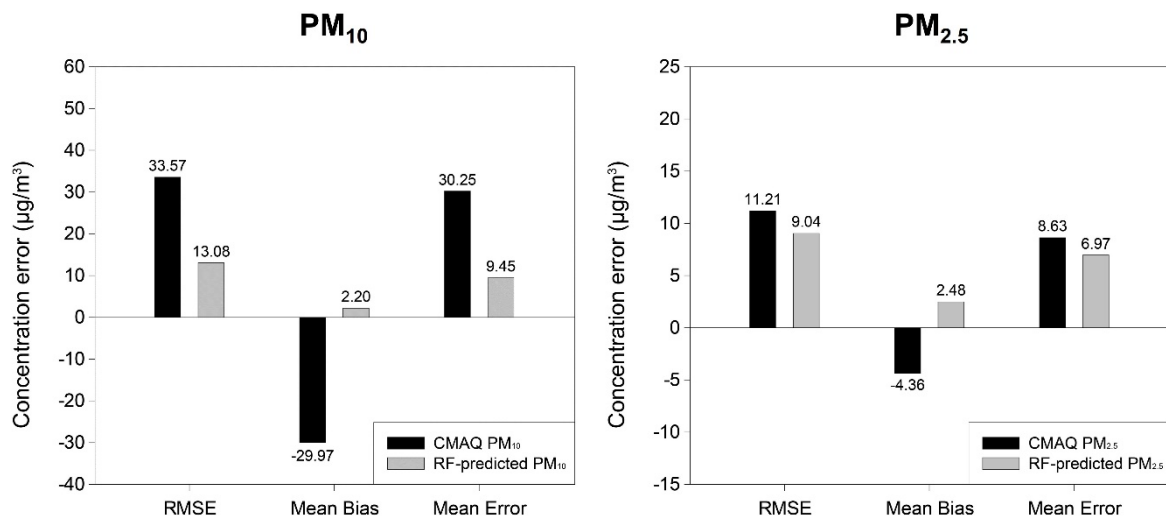

**Figure 9:** Comparison between the RF-based and CMAQ models using the hindcast validation data for estimating particulate matter concentrations: PM<sub>10</sub> and PM<sub>2.5</sub> with Root Mean Square Error (RMSE), Mean Bias (MB), and Mean Error (ME).

## 5 Conclusions

In this study, machine learning (i.e., RF) based models were developed to estimate ground-level PM<sub>10</sub> and PM<sub>2.5</sub> concentrations through the synergistic use of satellite data and model output over South Korea. The RF-based models developed using the balanced training samples produced good performance resulting in R<sup>2</sup> values of 0.78 and 0.73, and RMSEs of 17.08 µg/m<sup>3</sup> and 8.25 µg/m<sup>3</sup> for PM<sub>10</sub> and PM<sub>2.5</sub>, respectively. In particular, the proposed models estimated high PM concentrations well. GOCI-derived AOD was identified as the most significant input variable for estimating ground-level PM concentrations. A few meteorological variables such as MaxWS, RSDN, and dew-point temperature were also revealed as contributing variables. In addition, the anthropogenic factors such as urban ratio, population density, emission of SO<sub>2</sub> and NH<sub>3</sub> were considered significant for estimating PM<sub>2.5</sub> concentrations. Two-year and seasonal averaged maps of ground level PM concentrations agree with spatio-temporal patterns of PM concentrations reported in the literature.

The proposed RF models were also compared to the two process-based models (GEOS-Chem and CMAQ) using the hindcast validation data. When GOCI-derived AOD was incorporated with the GEOS-Chem data, the estimation of PM concentrations improved. However, the incorporated approach still underestimated high concentrations, when compared to the proposed RF models. Similar results were found for the comparison between the RF models and CMAQ, which implies the robustness of the proposed approach.

Although the proposed models performed better than the existing models, there are several ways to further improve the proposed models, which deserve further investigation. First, more input variables, especially those that are related to vertical information of AOD, can be used to improve the models. In addition, other sophisticated approaches such as deep learning could be utilized to improve the estimation accuracy for ground-level PM concentrations. Although only two-year data were used in this study, longer archives can be used to further refine the models. The synergistic use of forthcoming geostationary satellite series of GEO-KOMPSAT (GK)-2A with Advanced Meteorological Imager (AMI) and GK-2B with GOCI-II and Geostationary Environment Monitoring Spectrometer (GEMS) sensors, will provide more accurate aerosol information with higher spatial and temporal resolutions than those of GOCI. Such a synergy is likely to improve the estimation of ground-level PM concentrations in the near future.

## Acknowledgments

This study was supported by a grant from the National Institute of Environmental Research (NIER), funded by the Ministry of Environment (MOE) of the Republic of Korea (NIER-2017-01-02-063), the Space Technology Development Program through the National Research Foundation of Korea (NRF) funded by the Ministry of Science, ICT, & Future Planning (NRF-2017M1A3A3A02015981), and the National Strategic Project-Fine Particle of the National Research Foundation of Korea

(NRF) funded by the Ministry of Science and ICT (MSIT), the Ministry of Environment (ME), and the Ministry of Health and Welfare (MOHW) (NRF-2017M3D8A1092021).

## References

- Amani, M., Salehi, B., Mahdavi, S., Granger, J., and Brisco, B.: Wetland classification in Newfoundland and Labrador using multi-source SAR and optical data integration, *GIScience and Remote Sensing*, 54, 779-796, 2017.
- Baek, B. H., Seppanen, C., and Houyoux, M.: SMOKE v2. 6 User's manual [OL], 2009.
- Bartell, S. M., Longhurst, J., Tjoa, T., Sioutas, C., and Delfino, R. J.: Particulate air pollution, ambulatory heart rate variability, and cardiac arrhythmia in retirement community residents with coronary artery disease, *Environmental health perspectives*, 121, 1135, 2013.
- Borlina, C. S., and Rennó, N. O.: The Impact of a Severe Drought on Dust Lifting in California's Owens Lake Area, *Scientific Reports*, 7, 1784, 2017.
- Boylan, J. W., and Russell, A. G.: PM and light extinction model performance metrics, goals, and criteria for three-dimensional air quality models, *Atmospheric environment*, 40, 4946-4959, 2006.
- Breiman, L.: Random forests, *Machine learning*, 45, 5-32, 2001.
- Brokamp, C., Jandarov, R., Hossain, M., and Ryan, P.: Predicting Daily Urban Fine Particulate Matter Concentrations Using a Random Forest Model, *Environmental science & technology*, 52, 4173-4179, 2018.
- Chen, G., Li, S., Knibbs, L. D., Hamm, N., Cao, W., Li, T., Guo, J., Ren, H., Abramson, M. J., and Guo, Y.: A machine learning method to estimate PM 2.5 concentrations across China with remote sensing, meteorological and land use information, *Science of the Total Environment*, 636, 52-60, 2018.
- Choi, M.: Retrieval of aerosol optical properties from GOCI: Algorithm Improvement, Analysis and Application to PM (Doctoral dissertation), Graduate School, Yonsei University, Seoul, 2017.
- Choi, M., Kim, J., Lee, J., Kim, M., Holben, B., Eck, T. F., Li, Z., and Song, C. H.: GOCI Yonsei aerosol retrieval version 2 products: an improved algorithm and error analysis with uncertainty estimation from 5-year validation over East Asia, *Atmospheric Measurement Techniques*, 11, 385, 2018.
- Chudnovsky, A. A., Koutrakis, P., Kloog, I., Melly, S., Nordio, F., Lyapustin, A., Wang, Y., and Schwartz, J.: Fine particulate matter predictions using high resolution Aerosol Optical Depth (AOD) retrievals, *Atmospheric Environment*, 89, 189-198, 2014.
- Davies, T., Cullen, M. J., Malcolm, A. J., Mawson, M., Staniforth, A., White, A., and Wood, N.: A new dynamical core for the Met Office's global and regional modelling of the atmosphere, *Quarterly Journal of the Royal Meteorological Society*, 131, 1759-1782, 2005.
- Farr, T. G., Rosen, P. A., Caro, E., Crippen, R., Duren, R., Hensley, S., Kobrick, M., Paller, M., Rodriguez, E., and Roth, L.: The shuttle radar topography mission, *Reviews of geophysics*, 45, 2007.

- Forkuor, G., Dimobe, K., Serme, I., and Tondoh, J.: Landsat-8 vs. Sentinel-2: examining the added value of sentinel-2's red-edge bands to land-use and land-cover mapping in Burkina Faso, *GIScience and Remote Sensing*, 55, 331-354, 2018.
- Friedl, M. A., Sulla-Menashe, D., Tan, B., Schneider, A., Ramankutty, N., Sibley, A., and Huang, X.: MODIS Collection 5 global land cover: Algorithm refinements and characterization of new datasets, *Remote sensing of Environment*, 114, 168-182, 5 2010.
- Gao, M., Carmichael, G. R., Saide, P. E., Lu, Z., Yu, M., Streets, D. G., and Wang, Z.: Response of winter fine particulate matter concentrations to emission and meteorology changes in North China, *Atmospheric Chemistry and Physics*, 16, 11837, 2016.
- gon Ryou, H., Heo, J., and Kim, S.-Y.: Source apportionment of PM 10 and PM 2.5 air pollution, and possible impacts of 10 study characteristics in South Korea, *Environmental Pollution*, 2018.
- Gupta, A., Nag, S., and Mukhopadhyay, U.: Characterisation of PM10, PM2.5 and benzene soluble organic fraction of particulate matter in an urban area of Kolkata, India, *Environmental monitoring and assessment*, 115, 205-222, 2006.
- Gupta, P., and Christopher, S. A.: Particulate matter air quality assessment using integrated surface, satellite, and meteorological products: Multiple regression approach, *Journal of Geophysical Research: Atmospheres*, 114, 2009a.
- 15 Gupta, P., and Christopher, S. A.: Particulate matter air quality assessment using integrated surface, satellite, and meteorological products: 2. A neural network approach, *Journal of Geophysical Research: Atmospheres*, 114, 2009b.
- He, Q., and Huang, B.: Satellite-based mapping of daily high-resolution ground PM 2.5 in China via space-time regression modeling, *Remote Sensing of Environment*, 206, 72-83, 2018.
- Hu, B., Zhao, X., Liu, H., Liu, Z., Song, T., Wang, Y., Tang, L., Xia, X., Tang, G., and Ji, D.: Quantification of the impact of 20 aerosol on broadband solar radiation in North China, *Scientific Reports*, 7, 44851, 2017a.
- Hu, X., Belle, J. H., Meng, X., Wildani, A., Waller, L. A., Strickland, M. J., and Liu, Y.: Estimating PM2.5 Concentrations in the Conterminous United States Using the Random Forest Approach, *Environmental Science & Technology*, 51, 6936-6944, 2017b.
- Huffman, G. J., Bolvin, D. T., and Nelkin, E. J.: Integrated Multi-satellitE Retrievals for GPM (IMERG) technical 25 documentation, NASA/GSFC Code, 612, 47, 2015.
- Im, J., Jensen, J., Coleman, M., and Nelson, E.: Hyperspectral remote sensing analysis of short rotation woody crops grown with controlled nutrient and irrigation treatments, *Geocarto International*, 24, 293-312, 2009.
- Im, J., Park, S., Rhee, J., Baik, J., and Choi, M.: Downscaling of AMSR-E soil moisture with MODIS products using machine learning approaches, *Environmental Earth Sciences*, 75, 1120, 2016.
- 30 Jang, E., Im, J., Park, G.-H., and Park, Y.-G.: Estimation of fugacity of carbon dioxide in the East Sea using in situ measurements and Geostationary Ocean Color Imager satellite data, *Remote Sensing*, 9, 821, 2017.
- Jerrett, M., Turner, M. C., Beckerman, B. S., Pope III, C. A., van Donkelaar, A., Martin, R. V., Serre, M., Crouse, D., Gapstur, S. M., and Krewski, D.: Comparing the health effects of ambient particulate matter estimated using ground-based versus remote sensing exposure estimates, *Environmental health perspectives*, 125, 552, 2017.

- Ke, Y., Im, J., Park, S., and Gong, H.: Downscaling of MODIS One kilometer evapotranspiration using Landsat-8 data and machine learning approaches, *Remote Sensing*, 8, 215, 2016.
- Kim, M., Im, J., Han, H., Kim, J., Lee, S., Shin, M., and Kim, H.: Landfast sea ice monitoring using multi sensor fusion in the Antarctic, *GIScience and Remote Sensing*, 52, 239-256, 2015.
- 5 Koo, Y.-S., Kim, S.-T., Cho, J.-S., and Jang, Y.-K.: Performance evaluation of the updated air quality forecasting system for Seoul predicting PM10, *Atmospheric environment*, 58, 56-69, 2012.
- Krynicka, J., and Drzeniecka-Osiadacz, A.: Analysis of Variability in PM 10 Concentration in the Wrocław Agglomeration, *Polish Journal of Environmental Studies*, 22, 2013.
- Lee, S., Im, J., Kim, J., Kim, M., Shin, M., Kim, H.-c., and Quackenbush, L. J.: Arctic sea ice thickness estimation from  
10 CryoSat-2 satellite data using machine learning-based lead detection, *Remote Sensing*, 8, 698, 2016.
- Levy, R., Mattoo, S., Munchak, L., Remer, L., Sayer, A., Patadia, F., and Hsu, N.: The Collection 6 MODIS aerosol products over land and ocean, *Atmospheric Measurement Techniques*, 6, 2989, 2013.
- Li, K., Liao, H., Mao, Y., and Ridley, D. A.: Source sector and region contributions to concentration and direct radiative forcing of black carbon in China, *Atmospheric Environment*, 124, 351-366, 2016.
- 15 Li, R., Gong, J., Chen, L., and Wang, Z.: Estimating ground-level pm 2.5 using fine-resolution satellite data in the megacity of Beijing, China, *Aerosol Air Qual. Res*, 15, 1347-1356, 2015.
- Li, T., Shen, H., Yuan, Q., Zhang, X., and Zhang, L.: Estimating Ground-Level PM2.5 by Fusing Satellite and Station Observations: A Geo-Intelligent Deep Learning Approach, *Geophysical Research Letters*, 44, 2017a.
- Li, T., Shen, H., Zeng, C., Yuan, Q., and Zhang, L.: Point-surface fusion of station measurements and satellite observations  
20 for mapping PM2.5 distribution in China: Methods and assessment, *Atmospheric Environment*, 152, 477-489, 2017b.
- Liu, T., Im, J., and Quackenbush, L. J.: A novel transferable individual tree crown delineation model based on Fishing Net Dragging and boundary classification, *ISPRS Journal of Photogrammetry and Remote Sensing*, 110, 34-47, 2015.
- Liu, Y., Sarnat, J. A., Kilaru, V., Jacob, D. J., and Koutrakis, P.: Estimating ground-level PM2.5 in the eastern United States using satellite remote sensing, *Environmental science & technology*, 39, 3269-3278, 2005.
- 25 Liu, Y., Franklin, M., Kahn, R., and Koutrakis, P.: Using aerosol optical thickness to predict ground-level PM2.5 concentrations in the St. Louis area: A comparison between MISR and MODIS, *Remote sensing of Environment*, 107, 33-44, 2007.
- Liu, Y., Paciorek, C. J., and Koutrakis, P.: Estimating regional spatial and temporal variability of PM2.5 concentrations using satellite data, meteorology, and land use information, *Environmental health perspectives*, 117, 886, 2009.
- 30 Lu, Z., Im, J., and Quackenbush, L.: A volumetric approach to population estimation using Lidar remote sensing. *Photogrammetric Engineering and Remote Sensing*, 77, 1145-1156, 2011a.
- Lu, Z., Zhang, Q., and Streets, D. G.: Sulfur dioxide and primary carbonaceous aerosol emissions in China and India, 1996–2010, *Atmospheric Chemistry and Physics*, 11, 9839-9864, 2011b.



- Lv, B., Hu, Y., Chang, H. H., Russell, A. G., Cai, J., Xu, B., and Bai, Y.: Daily estimation of ground-level PM<sub>2.5</sub> concentrations at 4 km resolution over Beijing-Tianjin-Hebei by fusing MODIS AOD and ground observations, *Science of the Total Environment*, 580, 235-244, 2017.
- Maraziotis, E., Sarotis, L., Marazioti, C., and Marazioti, P.: Statistical analysis of inhalable (PM<sub>10</sub>) and fine particles (PM<sub>2.5</sub>) concentrations in urban region of Patras, Greece, *Global nest journal*, 10, 123-131, 2008.
- 5 Moon, K.-J., Park, S.-M., Park, J.-S., Song, I.-H., Jang, S.-K., Kim, J.-C., and Lee, S.-J.: Chemical Characteristics and Source Apportionment of PM<sub>2.5</sub> in Seoul Metropolitan Area in 2010, *Journal of Korean Society for Atmospheric Environment*, 27, 711-722, 2011.
- Park, M., Song, C., Park, R., Lee, J., Kim, J., Lee, S., Woo, J.-H., Carmichael, G., Eck, T. F., and Holben, B. N.: New approach to monitor transboundary particulate pollution over Northeast Asia, *Atmospheric Chemistry and Physics*, 14, 659-674, 2014.
- 10 Park, S., Im, J., Park, S., and Rhee, J.: Drought monitoring using high resolution soil moisture through machine learning approaches over the Korean peninsula, *Agriculture and Forest Meteorology*, 237, 257-269, 2017.
- Park, S and Shin, H.: Analysis of the Factors Influencing PM<sub>2.5</sub> in Korea: Focusing on Seasonal Factors, *Journal of Environmental Policy and Administration*, 25, 227-248, 2017.
- 15 Pham, T., Yoshino, K., and Bui, D.: Biomass estimation of *Sonneratia caseolaris* (L.) Engler at a coastal area of Hai Phong city (Vietnam) using ALOS-2 PALSAR imagery and GIS-based multi-layer perceptron neural networks, *GIScience and Remote Sensing*, 54, 329-353, 2017.
- Pope III, C. A., Ezzati, M., and Dockery, D. W.: Fine-particulate air pollution and life expectancy in the United States, *New England Journal of Medicine*, 360, 376-386, 2009.
- 20 Préndez, M. M., Egido, M., Tomas, C., Seco, J., Calvo, A., and Romero, H.: Correlation between solar radiation and total suspended particulate matter in Santiago, Chile—Preliminary results, *Atmospheric Environment*, 29, 1543-1551, 1995.
- Remer, L. A., Tanre, D., Kaufman, Y. J., Levy, R., and Mattoo, S.: Algorithm for remote sensing of tropospheric aerosol from MODIS: Collection 005, National Aeronautics and Space Administration, 1490, 2006.
- Richardson, H., Hill, D., Denesiuk, D., and Fraser, L.: A comparison of geographic datasets and field measurements to model soil carbon using random forests and stepwise regressions (British Columbia, Canada), *GIScience and Remote Sensing*, 54, 573-591, 2017.
- 25 Ryu, Y., Jiang, C., Kobayashi, H., and Detto, M.: MODIS-derived global land products of shortwave radiation and diffuse and total photosynthetically active radiation at 5 km resolution from 2000, *Remote Sensing of Environment*, 204, 812-825, 2018.
- Shi, Y., Zhang, J., Reid, J., Liu, B., and Hyer, E.: Critical evaluation of cloud contamination in the MISR aerosol products using MODIS cloud mask products, *Atmospheric Measurement Techniques*, 7, 1791-1801, 2014.
- 30 Sogacheva, L., Kolmonen, P., Virtanen, T. H., Rodriguez, E., Saponaro, G., and De Leeuw, G.: Post-processing to remove residual clouds from aerosol optical depth retrieved using the Advanced Along Track Scanning Radiometer, *Atmospheric Measurement Techniques*, 10, 491, 2017.

- Solano, R., Didan, K., Jacobson, A., and Huete, A.: MODIS vegetation index user's guide (MOD13 series), Vegetation Index and Phenology Lab, The University of Arizona, 1-38, 2010.
- Sonobe, R., Yamaya, Y., Tani, H., Wang, X., Kobayashi, N., and Mochizuki, K.: Assessing the suitability of data from Sentinel-1A and 2A for crop classification, *GIScience and Remote Sensing*, 54, 918-938, 2017.
- 5 Stolwijk, A., Straatman, H., and Zielhuis, G.: Studying seasonality by using sine and cosine functions in regression analysis, *Journal of Epidemiology & Community Health*, 53, 235-238, 1999.
- Van Donkelaar, A., Martin, R. V., Brauer, M., Kahn, R., Levy, R., Verduzco, C., and Villeneuve, P. J.: Global estimates of ambient fine particulate matter concentrations from satellite-based aerosol optical depth: development and application, *Environmental health perspectives*, 118, 847, 2010.
- 10 Van Donkelaar, A., Martin, R. V., Brauer, M., and Boys, B. L.: Use of satellite observations for long-term exposure assessment of global concentrations of fine particulate matter, *Environmental health perspectives*, 123, 135, 2015.
- van Zelm, R., Preiss, P., van Goethem, T., Van Dingenen, R., and Huijbregts, M.: Regionalized life cycle impact assessment of air pollution on the global scale: damage to human health and vegetation, *Atmospheric Environment*, 134, 129-137, 2016.
- Wang, Z., Chen, L., Tao, J., Zhang, Y., and Su, L.: Satellite-based estimation of regional particulate matter (PM) in Beijing  
 15 using vertical-and-RH correcting method, *Remote sensing of environment*, 114, 50-63, 2010.
- Wu, J., Yao, F., Li, W., and Si, M.: VIIRS-based remote sensing estimation of ground-level PM<sub>2.5</sub> concentrations in Beijing–Tianjin–Hebei: A spatiotemporal statistical model, *Remote Sensing of Environment*, 184, 316-328, 2016.
- Wu, Y., Guo, J., Zhang, X., Tian, X., Zhang, J., Wang, Y., Duan, J., and Li, X.: Synergy of satellite and ground based observations in estimation of particulate matter in eastern China, *Science of the Total Environment*, 433, 20-30, 2012.
- 20 Xu, J.-W., Martin, R., Van Donkelaar, A., Kim, J., Choi, M., Zhang, Q., Geng, G., Liu, Y., Ma, Z., and Huang, L.: Estimating ground-level PM<sub>2.5</sub> in eastern China using aerosol optical depth determined from the GOCI satellite instrument, *Atmospheric Chemistry and Physics*, 15, 13133-13144, 2015a.
- Xu, L., Guo, H., Boyd, C. M., Klein, M., Bougiatioti, A., Cerully, K. M., Hite, J. R., Isaacman-VanWertz, G., Kreisberg, N. M., and Knote, C.: Effects of anthropogenic emissions on aerosol formation from isoprene and monoterpenes in the  
 25 southeastern United States, *Proceedings of the National Academy of Sciences*, 112, 37-42, 2015b.
- Yeganeh, B., Hewson, M. G., Clifford, S., Knibbs, L. D., and Morawska, L.: A satellite-based model for estimating PM<sub>2.5</sub> concentration in a sparsely populated environment using soft computing techniques, *Environmental Modelling & Software*, 88, 84-92, 2017.
- Yoo, C., Im, J., Park, S., and Quackenbush, L. J.: Estimation of daily maximum and minimum air temperatures in urban  
 30 landscapes using MODIS time series satellite data, *ISPRS Journal of Photogrammetry and Remote Sensing*, 137, 149-162, 2018.
- Yoo, S., Im, J., and Wagner, J.: Variable selection for hedonic model using machine learning approaches: A case study in Onondaga County, NY, *Landscape and Urban Planning*, 107, 293-306, 2012.

You, W., Zang, Z., Zhang, L., Li, Z., Chen, D., and Zhang, G.: Estimating ground-level PM10 concentration in northwestern China using geographically weighted regression based on satellite AOD combined with CALIPSO and MODIS fire count, *Remote Sensing of Environment*, 168, 276-285, 2015.

5 Yu, W., Liu, Y., Ma, Z., and Bi, J.: Improving satellite-based PM 2.5 estimates in China using Gaussian processes modeling in a Bayesian hierarchical setting, *Scientific reports*, 7, 7048, 2017.

Zang, Z., Wang, W., You, W., Li, Y., Ye, F., and Wang, C.: Estimating ground-level PM2.5 concentrations in Beijing, China using aerosol optical depth and parameters of the temperature inversion layer, *Science of the Total Environment*, 575, 1219-1227, 2017.

10 Zhan, Y., Luo, Y., Deng, X., Chen, H., Grieneisen, M. L., Shen, X., Zhu, L., and Zhang, M.: Spatiotemporal prediction of continuous daily PM2.5 concentrations across China using a spatially explicit machine learning algorithm, *Atmospheric environment*, 155, 129-139, 2017.

Zhao, S., Yu, Y., Yin, D., He, J., Liu, N., Qu, J., and Xiao, J.: Annual and diurnal variations of gaseous and particulate pollutants in 31 provincial capital cities based on in situ air quality monitoring data from China National Environmental Monitoring Center, *Environment international*, 86, 92-106, 2016.
